# Supplementary material
Source: ML conference proceedings conference paper supplement (https://openreview.net/forum?id=ER1VDuwWvB)
Supplement: supplementary_material [file attachment]

# CORE: COMMON RANDOM RECONSTRUCTION FOR DISTRIBUTED OPTIMIZATION WITH PROVABLE LOW COMMUNICATION COMPLEXITY

**Anonymous authors**

Paper under double-blind review

## ABSTRACT

With distributed machine learning being a prominent technique for large-scale machine learning tasks, communication complexity has become a major bottleneck for speeding up training and scaling up machine numbers. In this paper, we propose a new technique named Common randOm REconstruction (CORE), which can be used to compress the information transmitted between machines in order to reduce communication complexity without other strict conditions. Especially, our technique CORE projects the vector-valued information to a low-dimensional one through common random vectors and reconstructs the information with the same random noises after communication. We apply CORE to two distributed tasks, respectively convex optimization on linear models and generic non-convex optimization, and design new distributed algorithms, which achieve provably lower communication complexities. For example, we show for linear models CORE-based algorithm can encode the gradient vector to  $\mathcal{O}(1)$ -bits (against  $\mathcal{O}(d)$ ), with the convergence rate not worse, preceding the existing results.

## 1 INTRODUCTION

Distributed machine learning and optimization have become the main technique for solving tasks with large model and data scales. In simple terms, the distributed optimization problem in machine learning can be regarded as minimizing an objective function  $f$  defined as an average of individual functions that are respectively accessible by their corresponding local machines. More specifically, we consider a constrained optimization problem

$$\begin{aligned} \underset{\mathbf{x} \in \mathbb{R}^d}{\text{minimize}} \quad & f(\mathbf{x}) \equiv \frac{1}{n} \sum_{i=1}^n f_i(\mathbf{x}_i) \\ \text{s.t.} \quad & \mathbf{x}_1 = \mathbf{x}_2 = \dots = \mathbf{x}_n. \end{aligned} \tag{1}$$

Here  $f_i$  represents the individual objective function at the local machine  $i$  and the constraint in (1) guarantees different machines corporately finding the same minimizer of the global objective function  $f$ . Typical examples for  $f_i$  include regression or classification over linear, graphic, as well as (deep) neural network models. In these cases,  $f_i$  shares the form as  $f_i(\mathbf{x}) \equiv F(\mathbf{x}; \zeta_i)$ , where  $\zeta_i$  denotes the data stored in machine  $i$  and  $F$  represents the learning model.

One dominating **bottleneck** for further improving the speed of distributed machine learning is the communication bandwidth. With the increase of machine numbers and parameter scale, time spent on communication can not be ignored and even becomes much longer than that on computation. Such a problem is much more salient when the bandwidth of computing cluster is restricted, such as mobile devices. Many researchers have noticed that reducing the dimensions of data transmitted between machines can effectively reduce the communication complexity, and proposed heuristic techniques, such as quantization (Seide et al., 2014) and sparsity (Aji & Heafield, 2017), to reduce the communication burden to some degree. Some more complete and theoretically guaranteed algorithms based on these techniques are proposed soon, However, to the best of our knowledge, although some researches show how to improve existing compression techniques or propose several new ones, few results provide concrete and feasible compression techniques that can provably reduce communication costs and maintain algorithm accuracy under mild conditions. In this paper,

we propose a new technique named Common randOm REconstruction (CORE) which presents a provable result on low communication complexity. CORE is a technique that can be used to transmit a sequence of vector-valued information that follows from well-known ideas from information theory and communication complexity theory, taking advantage of common random variables. At each round, the vector-valued information is projected to a low-dimensional vector using Gaussian random noises by the sender, and after communication reconstructed with the same noises by the receiver. We show such a procedure generates an unbiased estimator of the original vector-valued information with a controlled variance. We apply CORE to two distributed tasks, namely convex optimization on linear models and generic non-convex optimization. Compared with some existing relevant researches, ours has certain advantages. First, we propose a concrete and feasible compression technique and algorithms instead of an abstract but potentially not implementable framework to reduce communication costs. Second, our algorithms provably achieve much lower communication costs compared with the existing algorithms under realizable conditions.

## 1.1 RELATED WORK

In this section we briefly introduce the related work about our methods, including gradient compression, random sketching technique, distributed optimization and federated learning, and random communication complexity. A more detailed introduction can be seen in Appendix A.

**Gradient compression.** Gradient compression is the main technique to reduce communication complexity during the process of training. The representative achievements are gradient quantization (Seide et al., 2014; Tang et al., 2021) and gradient sparsification (Wangni et al., 2018; Shi et al., 2019; Jiang & Agrawal, 2018). Moreover, some methods (Wen et al., 2017; Alistarh et al., 2017; Wu et al., 2018; Faghri et al., 2020; Horvóth et al., 2022; Mishchenko et al., 2019; Aji & Heafield, 2017; Lin et al., 2017; Wang et al., 2018; Mishchenko et al., 2020) obtained better results based on previous works. In addition, some new techniques based on innovative ideas have also been developed and achieved good results. For example, PowerSGD (Vogels et al., 2019) proposed a new low-rank gradient compressor. Other techniques (Bernstein et al., 2018; Safaryan & Richtárik, 2019; Beznosikov et al., 2020; Horváth et al., 2023; Richtárik et al., 2022) were also proposed as innovative new achievements. However, the second moments of these estimations are often of order  $d$ , which implies a restriction of the total communication costs.

**Random sketching.** Sketching (Gribonval et al., 2020; Woodruff et al., 2014; Ikononovska et al., 2007) is a widely-used technique in machine learning, data mining and optimization, whose core idea is to reduce the scale by a probabilistic data structure to approximate the data to reduce the computation costs. It is worth noticing that some researchers have started to use the sketching technique to reduce communication costs during the process of training. For example, FedAvg (Konečný et al., 2016) and SKETCHED-SGD (Ivkin et al., 2019), which uses Count Sketch (Charikar et al., 2004) to compress the gradient. They also presented a theoretical analysis of convergence, but when  $d$  is large, it is much worse than SGD. Hanzely et al. (2018) proved that when adding biased estimates on the basis of random matrix sketching, their algorithm achieves a faster convergence rate and can be accelerated. However, they did not come up with a specific sketching method. Moreover, Lee et al. (2019) and Pilanci et al. (2015) proposed some sketched Hessian-based second-order optimization algorithms. In this work, we mainly focus on gradient-based communication-efficient methods.

**Distributed optimization.** Distributed machine learning and optimization have developed rapidly in recent years. In the early years, the main achievements were based on the existing optimization algorithms (Cotter et al., 2011; Lee et al., 2015; Shi et al., 2015; Scaman et al., 2017b). In recent years, some compressed gradient descent algorithms (Khirirat et al., 2018; Mishchenko et al., 2019; Gorbunov et al., 2021; Tyurin & Richtárik, 2022; Li & Richtárik, 2021) based on compression techniques mentioned above were also proposed. But almost all the methods above have the total communication costs at  $\mathcal{O}(d)$  level. It is worth noticing that in practice  $d$  is often extremely large. So there is still a lack of a concrete compression technique and corresponding distributed algorithm that achieves low communication complexity when  $d$  is large. Our work fills this gap. In addition, error feedback technique (Stich & Karimireddy, 2019; Karimireddy et al., 2019; Tang et al., 2019; Gruntkowska et al., 2022; Richtárik et al., 2021; Fatkhullin et al., 2021) was also widely used in compressed distributed optimization.

**Federated learning.** Federated Learning is another machine learning setting concentrating on communication costs, where the goal is to train a high-quality centralized model while training data remains distributed over a large number of clients each with unreliable and relatively slow network connections. In the early years, some federated learning algorithms (Konečný et al., 2016; Rothchild et al., 2020; Ivkin et al., 2019; Karimireddy et al., 2020; Mitra et al., 2021) based on the local gradient have been proposed. However, the approximation of local gradient often results in a loss of convergence rate. The total communication costs are either worse than or equal to those of vanilla gradient descent. Recently, some new communication-efficient methods such as Scaffnew (Mishchenko et al., 2022) and GradSkip (Maranjyan et al., 2022) have been proposed to achieve the same communication rounds as the lower bound of smooth and strongly-convex objective functions  $\mathcal{O}(\sqrt{\kappa})$ , but the total communication costs are still  $\mathcal{O}(d)$ .

**Random communication complexity.** In theoretical computer science, communication complexity studies the amount of communication needed to solve a problem when input data is distributed among several parties. Communication complexity was first proposed in Andrew (1979). Andrew (1979) also defined randomized protocol and randomized communication complexity. In a randomized protocol, parties are given a common random string as the input to a deterministic protocol. Random protocols can determine the answer in high probability with much less amount of information transmitted, so randomized communication complexity is much lower than deterministic communication complexity in expectation. Inspired by the advantage of randomized protocols over deterministic ones, we designed a random compression method for distributed optimization which is faster in expectation. Newman (1991) proved that any protocol using a common random string can be simulated by a private random string protocol, with an extra  $\mathcal{O}(\log n)$  bits.

## 1.2 CONTRIBUTIONS

In this work, we introduce the Common randOm REconstruction (CORE) technique and demonstrate its application in two distributed tasks. The advantages of utilizing CORE in these tasks are outlined below.

To the best of our knowledge, CORE is the first concrete and feasible compression method that achieves a limited bounded variance of the estimate and provably reduce communication complexity when the eigenvalues of the Hessian matrices of  $f$  drop very fast. We have observed that in practice, the rapid decrease of eigenvalues in the Hessian matrix has long been recognized. For instance, researchers have introduced concepts like effective rank (e.g., Hsu et al. (2012)) to quantify the dimensionality of the data’s influence on linear models. Some recent empirical studies (Sagun et al., 2016) carefully compute the eigenvalue of Hessian curves during training for (deep) neural networks. (See Figure 4 for an example of eigenvalues of a real dataset and a neural network in Appendix L).

To characterize the strength of CORE in rigor, we introduce the factor

$$r_\alpha = \sup_{\mathbf{x} \in \mathbb{R}^d} \sum_{i=1}^d \lambda_i^\alpha(\nabla^2 f(\mathbf{x})), \quad \alpha > 0 \quad (2)$$

as the effective dimension for distributed optimization, where  $\lambda_i(\cdot)$  is the  $i$ -th singular value (also the eigenvalue when  $\nabla^2 f(\mathbf{x})$  is semi-definite in convex case). This is inspired by the recent work of zeroth-order optimization (Yue et al., 2023), Langevin sampling (Freund et al., 2022), and distributed optimization (Hanzely et al., 2018). We further introduce the Hessian domination assumption, a concept employed in various studies for theoretical analysis (Hanzely et al., 2018; Safaryan et al., 2021; Yue et al., 2023). We apply CORE to some gradient-descent-based algorithms and use the effective dimension  $r_\alpha$  to characterize their communication costs. By combining CORE with centralized gradient descent (CGD), we propose the CORE-Gradient Descent (CORE-GD) algorithm for linear regression and prove that for the standard case where  $f$  has  $L$ -Lipschitz gradients, CORE-GD achieves  $\mathcal{O}(r_1(f)D^2\epsilon^{-1})$  communication costs to obtain an  $\epsilon$ -optimal solution, where  $D = \|\mathbf{x}^0 - \mathbf{x}^*\|$ . Compared with CDG which achieves  $\mathcal{O}(dLD^2\epsilon^{-1})$  communication costs, CORE-GD has a significant advantage since  $r_1(f)$  is much smaller than  $dL$  in most cases when eigenvalues decay fast. In Appendix B, we also study accelerations of CORE-GD using the momentum technique, and propose a heavy-ball-based accelerated algorithm named CORE-Accelerated Gradient Descent (CORE-AGD) for linear regression. We prove that CORE-AGD achieves the state-of-the-art  $\tilde{\mathcal{O}}\left(\frac{r_{1/2}(f)}{\mu^{1/2}}\right)$

Table 1: The performance of communication-efficient methods

| method                            | communication rounds                                                      | compressor         | floats sent per round                                  | total communication costs                                             |
|-----------------------------------|---------------------------------------------------------------------------|--------------------|--------------------------------------------------------|-----------------------------------------------------------------------|
| CGD Nesterov (2003)               | $\tilde{\mathcal{O}}(\frac{dL}{\mu})$                                     | -                  | $\Theta(d)$                                            | $\tilde{\mathcal{O}}(\frac{dL}{\mu})$                                 |
| ACGD Nesterov (2003)              | $\tilde{\mathcal{O}}(\frac{dL^{1/2}}{\mu^{1/2}})$                         | -                  | $\Theta(d)$                                            | $\tilde{\mathcal{O}}(\frac{dL^{1/2}}{\mu^{1/2}})$                     |
| FedLin Mitra et al. (2021)        | $\tilde{\mathcal{O}}(\frac{d^{3/2}L}{k^{3/2}\mu})$                        | Top-K <sup>1</sup> | $\Theta(k)$                                            | $\tilde{\mathcal{O}}(\frac{d^{3/2}L}{k^{3/2}\mu})$                    |
| Scaffnew Mishchenko et al. (2022) | $\tilde{\mathcal{O}}(\frac{dL^{1/2}}{\mu^{1/2}})$                         | Skip <sup>2</sup>  | $\Theta(d)$                                            | $\tilde{\mathcal{O}}(\frac{dL^{1/2}}{\mu^{1/2}})$                     |
| GandSkip Maranjyan et al. (2022)  | $\tilde{\mathcal{O}}(\frac{dL^{1/2}}{\mu^{1/2}})$                         | Skip <sup>2</sup>  | $\Theta(d)$                                            | $\tilde{\mathcal{O}}(\frac{dL^{1/2}}{\mu^{1/2}})$                     |
| DIANA Mishchenko et al. (2019)    | $\tilde{\mathcal{O}}(\frac{d}{K} + \frac{dL}{Kn\mu})^3$                   | Top-K <sup>1</sup> | $\Theta(K)$                                            | $\tilde{\mathcal{O}}(d + \frac{dL}{n\mu})$                            |
| ADIANA Li et al. (2020)           | $\tilde{\mathcal{O}}(\frac{d}{K} + \frac{dL^{1/2}}{Kn^{1/2}\mu^{1/2}})^3$ | Top-K <sup>1</sup> | $\Theta(K)$                                            | $\tilde{\mathcal{O}}(d + \frac{dL^{1/2}}{n^{1/2}\mu^{1/2}})^4$        |
| ASEGA Hanzely et al. (2018)       | $\tilde{\mathcal{O}}(\frac{\sum_{i=1}^d A_{ii}^{1/2}}{\mu^{1/2}})$        | -                  | $\Theta(1)^5$                                          | $\tilde{\mathcal{O}}(\frac{\sum_{i=1}^d A_{ii}^{1/2}}{\mu^{1/2}})$    |
| CORE-GD (this work)               | $\tilde{\mathcal{O}}(\frac{L}{\mu})$                                      | CORE               | $\Theta(\frac{\text{tr}(\mathbf{A})}{L})$              | $\tilde{\mathcal{O}}(\frac{\text{tr}(\mathbf{A})}{\mu})$              |
| CORE-AGD (this work)              | $\tilde{\mathcal{O}}(\frac{L^{1/2}}{\mu^{1/2}})$                          | CORE               | $\Theta(\frac{\sum_{i=1}^d \lambda_i^{1/2}}{L^{1/2}})$ | $\tilde{\mathcal{O}}(\frac{\sum_{i=1}^d \lambda_i^{1/2}}{\mu^{1/2}})$ |

<sup>1</sup> FedLin, DIANA and ADIANA only propose the algorithms using compressor, but do not propose concrete gradient compression technique. They use Top-K as an example to analyse the communication rounds and costs.

<sup>2</sup> Scaffnew and GandSkip use communication skipping instead of gradient compressor. Specifically, they only communicate every  $\mathcal{O}(\frac{L^{1/2}}{\mu^{1/2}})$  rounds and the total computation rounds are  $\tilde{\mathcal{O}}(\frac{L}{\mu})$ .

<sup>3</sup> The communication rounds of DIANA are  $\tilde{\mathcal{O}}(\omega + \frac{\omega L}{n\mu})$  when  $\omega \geq n$ . And similarly, that of ADIANA is  $\tilde{\mathcal{O}}(\omega + \frac{\omega L^{1/2}}{n^{1/2}\mu^{1/2}})$  when  $\omega \geq n$ . Here  $\omega$  is compression ratio. For example, when using Top-K compressor, the compression ratio is  $\frac{d}{K}$ , which is much larger than  $n$  when the dimension of data is extremely large. In this setting  $n$  can be seen as  $\mathcal{O}(1)$ .

<sup>4</sup> The theoretical bound of the total communication costs of this method is  $\tilde{\mathcal{O}}(d + \frac{d^{1/2}L^{1/2}}{\mu^{1/2}})$ , and the bound of CORE-AGD is  $\tilde{\mathcal{O}}(\frac{d^{1/2}\text{tr}(\mathbf{A})^{1/2}}{\mu^{1/2}})$ . In most cases when  $\text{tr}(\mathbf{A})$  is bounded and  $d$  is much large, CORE-AGD is better.

<sup>5</sup> This method is coordinate-descent-based. We show that CORE-AGD is theoretically better. Letting  $\mathbf{A} = \mathbf{U}^T \Sigma \mathbf{U}$  where  $\mathbf{U} = [u_{ij}]$  and  $\Sigma = \text{diag}\{\lambda_i\}$ , we have  $A_{ii} = \sum_{j=1}^d \lambda_j u_{ji}^2 \geq (\sum_{j=1}^d \lambda_j^{1/2} u_{ji}^2)^2$  (because the Hessian matrix is positive definite and symmetric). Thus we have  $\sum_{i=1}^d A_{ii}^{1/2} \geq \sum_{i=1}^d \lambda_i^{1/2}$ .

communication costs which is lower than  $\tilde{\mathcal{O}}(d + \frac{dL^{1/2}}{n^{1/2}\mu^{1/2}})$  in Li et al. (2020) and  $\tilde{\mathcal{O}}(\frac{\sum_{i=1}^d M_{ii}^{1/2}}{\mu^{1/2}})$  in Hanzely et al. (2018). More details and comparisons are shown in Table 1. Compared with the results in Hanzely et al. (2018), our works present a concrete compression technique. In Section 5, we then examine the efficiency of CORE in generic non-convex optimization when finding an  $\epsilon$ -approximated first-order stationary point. We further assume a Hessian-Lipschitz condition and show that CORE-GD with carefully chosen stepsize can achieve lower communication costs which reduces upon the communication costs of CGD by a  $\min\{dL/r_1(f), \epsilon^{-0.5}d^{1/4}\}$  factor.

In summary, the contribution of the paper is listed below:

- (A) We propose a new technique called CORE to efficiently transmit information between machines. To the best of our knowledge, CORE is the *first* concrete and feasible compression technique that is provably more efficient on communication when eigenvalues drop fast and can be applied to gradient-descent-based algorithms.
- (B) We apply CORE to convex optimization on linear models and generic non-convex optimization. We design new optimization algorithms and show a *remarkable reduction* of communication complexity under realizable conditions. Compared with the recent distributed optimization and federated learning algorithms, our CORE-GD and CORE-AGD achieve the lower bound of iteration rounds the *state-of-the-art* total communication costs under the realizable condition.

Finally, we propose a reduction framework that extends CORE to work on decentralized communication in Appendix E. We show the price is only an additional  $\tilde{\mathcal{O}}(\sqrt{\gamma})$  factor, where  $\gamma$  is the eigengap of the gossip matrix for the network topology. We also show that CORE is equipped with some privacy guarantee naturally for the use of random vectors, and prove our results in Appendix J. We conduct empirical studies where we compare CORE with the basic frequently used quantization and sparsity techniques both on linear models and (deep) neural networks in Appendix K.

### 1.3 NOTATION

Throughout this paper, we use the convention  $\mathcal{O}(\cdot)$ ,  $\Omega(\cdot)$ , and  $\Theta(\cdot)$  to denote the *lower*, *upper* and *lower and upper* bound with a global constant, and use  $\tilde{\mathcal{O}}(\cdot)$  to denote the lower bound that hides

a poly-logarithmic factor of the parameters. Let  $\mathbb{R}$  denote the set of real numbers, and  $\mathbb{R}^d$  denote a  $d$ -dimensional Euclidean space. We use bold lowercase letters, like  $\mathbf{x}$ , to represent a vector, and bold capital letters, like  $\mathbf{A}$ , to represent a matrix. Specially, we use  $\mathbf{I}_d$  to represent the identity matrix in  $d$ -dimensional Euclidean space, and omit the subscript when  $d$  is clear from the context for simplicity. Let  $\langle \cdot, \cdot \rangle$  denote the inner product of two vectors in the Euclidean space,  $\|\mathbf{x}\|$  denote the Euclidean norm of a vector, and  $\|\mathbf{A}\|$  denote the operator norm of a matrix. It is worth noticing that we use  $\|\mathbf{x}\|_{\mathbf{A}}$  to denote the Mahalanobis (semi) norm where  $\mathbf{A}$  is a positive semi-definite matrix, which can be specifically defined as  $\|\mathbf{x}\|_{\mathbf{A}} = \sqrt{\mathbf{x}^\top \mathbf{A} \mathbf{x}}$ . For all the functions  $f$  appearing in this paper, we simply assume that  $f \in \mathcal{C}^2$ , which means that  $f$  has a well-defined second-order derivative. We use  $\nabla f(\mathbf{x})$  and  $\nabla^2 f(\mathbf{x})$  to denote the first-order and second-order derivative of  $f$ . Moreover, we always assume that the objective function  $f$  satisfies some basic assumptions in Section 2 and the minimizer of  $f$  exists. We use  $\mathbf{x}^*$  to denote the minimizer, i.e.  $\mathbf{x}^* \triangleq \operatorname{argmin}_{\mathbf{x}} f(\mathbf{x})$  and  $f^*$  to denote its minimum value, i.e.  $f^* \triangleq \min_{\mathbf{x}} f(\mathbf{x})$ .

## 2 PRELIMINARY

In this section, we formally present some definitions and assumptions to constrain the objective function and the optimization problem.

**Assumption 2.1** (*L-smoothness*). We say a function  $f$  is  $L$ -smooth (or has  $L$ -Lipschitz continuous gradients), if  $\|\nabla f(\mathbf{x}) - \nabla f(\mathbf{y})\| \leq L\|\mathbf{x} - \mathbf{y}\|$  for all  $\mathbf{x}, \mathbf{y} \in \mathbb{R}^d$ .

Consequently, for the function  $f \in \mathcal{C}^2$ , we have the following inequality based on the  $L$ -smoothness of  $f$  (see Nesterov (2003, Chapter 1)):  $f(\mathbf{y}) \leq f(\mathbf{x}) + \langle \nabla f(\mathbf{x}), \mathbf{y} - \mathbf{x} \rangle + \frac{L}{2}\|\mathbf{x} - \mathbf{y}\|^2$ ,  $\forall \mathbf{x}, \mathbf{y} \in \mathbb{R}^d$ .

**Assumption 2.2** (*Convexity*). We say a function  $f$  is convex if  $f(\mathbf{y}) \geq f(\mathbf{x}) + \langle \nabla f(\mathbf{x}), \mathbf{y} - \mathbf{x} \rangle + \frac{\mu}{2}\|\mathbf{x} - \mathbf{y}\|^2$  for all  $\mathbf{x}, \mathbf{y} \in \mathbb{R}^d$ , where  $\mu \geq 0$ . Moreover, if  $\mu > 0$ ,  $f$  is said to be  $\mu$ -strongly convex.

**Assumption 2.3** (*H-Hessian Lipschitz continuity*). We say  $f \in \mathcal{C}^2$  has  $H$ -Hessian Lipschitz continuous Hessian matrices if  $\|\nabla^2 f(\mathbf{x}) - \nabla^2 f(\mathbf{y})\| \leq H\|\mathbf{x} - \mathbf{y}\|$  for all  $\mathbf{x}, \mathbf{y} \in \mathbb{R}^d$ .

Next we define some frequently-used criteria for an approximate solution. For convex problems, we aim to find an  $\epsilon$ -approximate solution satisfying the definition below:

**Definition 2.4** ( $\epsilon$ -approximate solution). We say  $\mathbf{x}$  is an  $\epsilon$ -approximate solution of  $f$  if  $f(\mathbf{x}) - f^* \leq \epsilon$ .

For non-convex problems, finding an  $\epsilon$ -approximate solution in general is NP-hard (Murty & Kabadi, 1985). Instead we consider finding an  $\epsilon$ -approximate first-order stationary point satisfying the definition below:

**Definition 2.5** ( $\epsilon$ -stationary point). We say  $\mathbf{x}$  is an  $\epsilon$ -approximate first-order stationary point of  $f$  if  $\|\nabla f(\mathbf{x})\| \leq \epsilon$ .

## 3 COMMON RANDOM RECONSTRUCTION: CORE IDEA

In this section, we present in detail the underlying idea of our Common RandOm REconstruction (CORE) technique behind the algorithm design. We can see such a technique reduces the quantities of data transmitted during communication to a great extent, which significantly reduces the communication complexity. It is of great importance in distributed optimization tasks.

In most distributed machine learning tasks, information is transferred from one machine to another one in vector form, i.e. the gradient of the objective function. Suppose the dimension of the information is  $d$ . When a machine transmits a  $d$ -dimensional vector to another machine, the communication cost is  $d$ . However, in most applications, the dimension  $d$  is very large. As a result, it is very expensive to send the whole vector. Inspired by the theory of communication complexity (Andrew, 1979), we propose a **feasible technique which realizes the dimension reduction by randomization**. Specifically, we suppose that all the machines have a common random number generator, which generates a fresh random Gaussian vector  $\xi \sim N(0, \mathbf{I}_d)$  at each transmission. We denote the information we want to transmit by  $\mathbf{a} \in \mathbb{R}^d$ . Instead of sending the  $d$ -dimension vector  $\mathbf{a}$ , we send a scalar  $\langle \mathbf{a}, \xi \rangle$  which is the inner production of  $\mathbf{a}$  and the common random Gaussian vector  $\xi$ . Then the receiver reconstructs  $\mathbf{a}$  by multiplying  $\xi$  with the scalar.

**Algorithm 1** CORE: Common Random Reconstruction

---

**Require:** An vector  $\mathbf{a}$ , machines  $M_1$  and  $M_2$ , one-round communication budget  $m$ , a common random number generator

**while**  $M_1$  want to send  $\mathbf{a}$  to  $M_2$  **do**

Generate fresh i.i.d. random Gaussian vectors  $\xi_1, \dots, \xi_m \sim N(0, \mathbf{I}_d)$  with the common random number generator

$M_1$  sends  $\{p_i\}_{i=1}^m$  to  $M_2$  with  $p_i = \langle \mathbf{a}, \xi_i \rangle$

$M_2$  reconstructs  $\mathbf{a}$  by  $\tilde{\mathbf{a}} = \frac{1}{m} \sum_{i=1}^m p_i \cdot \xi_i$

**end while**

---

To ensure the training accuracy and convergence rate, we can take  $m$  fresh random Gaussian vectors for dimension reduction, where  $m$  is the one-round communication budget. Specifically, We send  $m$  scalars which are the inner products of  $\mathbf{a}$  with  $m$  random Gaussian vectors, and reconstruct  $\tilde{\mathbf{a}}$  by averaging over the reconstructions using all  $m$  random Gaussian vectors. We call this compression and reconstruction scheme Common Random Reconstruction (CORE), and describe it in Algorithm 1. In Algorithm 1, the estimation of  $\mathbf{a}$  admits:

$$\tilde{\mathbf{a}} = \frac{1}{m} \sum_{i=1}^m \langle \mathbf{a}, \xi_i \rangle \cdot \xi_i. \quad (3)$$

The next important question is whether this technique can guarantee the accuracy of the results. In Lemma 3.1 and Lemma 3.2, we show that  $\tilde{\mathbf{a}}$  is an unbiased estimator, and the variance of  $\tilde{\mathbf{a}}$  can be bounded under arbitrary matrix norms.

**Lemma 3.1.**  $\tilde{\mathbf{a}}$  is an unbiased estimator of  $\mathbf{a}$ :

$$\mathbb{E}_{\xi_1, \dots, \xi_m} \tilde{\mathbf{a}} = \mathbf{a}. \quad (4)$$

**Lemma 3.2.** The variance of  $\tilde{\mathbf{a}}$  under norm  $\|\cdot\|_{\mathbf{A}}$ , where  $\mathbf{A}$  is a given positive semi-definite symmetric matrix, can be bounded by  $\frac{3\text{tr}(\mathbf{A})}{m} \|\mathbf{a}\|^2 - \frac{1}{m} \|\mathbf{a}\|_{\mathbf{A}}^2$ :

$$\mathbb{E}_{\xi_1, \dots, \xi_m} \|\tilde{\mathbf{a}} - \mathbf{a}\|_{\mathbf{A}}^2 \leq \frac{3\text{tr}(\mathbf{A})}{m} \|\mathbf{a}\|^2 - \frac{1}{m} \|\mathbf{a}\|_{\mathbf{A}}^2. \quad (5)$$

**Remark 3.3.** Lemmas 3.1 and 3.2 bound the first and second moments of  $\tilde{\mathbf{a}}$ , which provide us theoretical guarantee of the convergence accuracy if we replace  $\mathbf{a}$  by  $\tilde{\mathbf{a}}$  in certain algorithms. First, it is obvious that  $\tilde{\mathbf{a}}$  has a **sub-exponential tail** distribution given  $\mathbf{a}$ , so we can provide high probability results using concentration inequalities. Second, the variance of  $\tilde{\mathbf{a}}$  is **upper bounded** when  $\text{tr}(\mathbf{A})$  is smaller, ensuring the convergence accuracy of our technique with a lower communication cost.

In most cases, when eigenvalues decrease rapidly indicating that  $\text{tr}(\mathbf{A})$  is not large, our technique demonstrates substantial improvement. Indeed, the CORE technique finds application in a diverse range of distributed optimization tasks across various settings. These include scenarios involving gradient-based algorithms, proximal algorithms, as well as both centralized and decentralized distributed optimization approaches. In this paper, we focus on the gradient-based distributed optimization algorithms on the centralized distributed optimization, by transmitting the reconstruction by our CORE method,  $\tilde{\mathbf{a}}$ , instead of the full gradient vector  $\tilde{\mathbf{a}}$ , to reduce the communication cost in each round.

## 4 CORE ON LINEAR MODELS

In this section, we delve into the behavior of CORE on linear models. To provide a clear illustration of the CORE technique, we focus on representative and straightforward cases that encompass the linear model. This model stands as one of the most crucial applications of convex optimization in machine learning. We extend our analysis to more general cases in Section 5 and Appendix D.

**Algorithm 2** CORE-GD with per-round communication budget  $m$ 


---

**Require:**  $n$  machines, a central machine, a common random number generator,  $m \leq \frac{\text{tr}(\mathbf{A})}{L}$ ,  $\mathbf{x}^0$ ,  $k = 0$ , step-size  $h_k = \frac{m}{4\text{tr}(\mathbf{A})}$

**while**  $k < N$  **do**

Generate fresh i.i.d.  $m$  Gaussian vectors  $\xi_1, \dots, \xi_m$  with the common random number generator

Machine  $i$  sends  $p_{ij} = \langle \nabla f_i(\mathbf{x}^k), \xi_j \rangle$  to the central machine

The central machine sends  $\sum_{i=1}^n p_{ij}$  back to every machine

Machines reconstruct  $\tilde{\nabla}_m f(\mathbf{x}^k)$  by  $\tilde{\nabla}_m f(\mathbf{x}^k) = \frac{1}{m} \sum_{i=1}^n \sum_{j=1}^m p_{ij} \xi_j$

Machines update  $\mathbf{x}^k$  by  $\mathbf{x}^{k+1} = \mathbf{x}^k - h_k \tilde{\nabla}_m f(\mathbf{x}^k)$

$k \leftarrow k + 1$

**end while**

---

We start with the general components of CORE. Suppose we have  $n$  machines. Based on the analysis of our core idea, we use Algorithm 1 to compress and reconstruct the gradient vector as below,

$$\tilde{\nabla}_m f(\mathbf{x}) = \frac{1}{nm} \sum_{i=1}^n \sum_{j=1}^m \langle \nabla f_i(\mathbf{x}), \xi_j \rangle \cdot \xi_j. \quad (6)$$

Then from Lemma 3.1 and Lemma 3.2,  $\tilde{\nabla}_m f(\mathbf{x})$  is an unbiased stochastic estimation of  $\nabla f(\mathbf{x})$  with a controlled variance. This implies that if one can design a variety of optimization algorithms using the stochastic oracle  $\tilde{\nabla}_m f(\mathbf{x})$ , then these algorithms can be efficiently implemented by CORE. In this paper, we introduce two typical algorithms based on GD and AGD.

Now we introduce the CORE-GD algorithm, where at each gradient descent step, the gradient  $\nabla f(\mathbf{x})$  is replaced by estimator  $\tilde{\nabla}_m f(\mathbf{x})$  using CORE. The whole algorithm is presented in Algorithm 2, where we let  $m$  be the communication budget for a communication round. To show the strength of CORE, we consider the objective function satisfying a mild assumption:  $\mathbf{A}$ -Hessian domination condition, which is defined as follows:

**Definition 4.1** ( $\mathbf{A}$ -Hessian domination).  $f$  is said to be  $\mathbf{A}$ -Hessian dominated if there exists  $\mathbf{A}$  such that

$$\nabla^2 f(\mathbf{x}) \preceq \mathbf{A} \quad (7)$$

for every  $\mathbf{x} \in \mathbb{R}^d$ .

We aim to characterize the complexity in terms of  $\text{tr}(\mathbf{A})$ . We note that when  $f$  is  $L$ -smooth, a loose bound for  $\mathbf{A}$  is  $\mathbf{A} \preceq LI$ . The fact implies that  $\text{tr}(\mathbf{A})$  will reach  $dL$  in the worst case, whereas,  $\text{tr}(\mathbf{A})$  can be much smaller than  $dL$  in most cases. We will show that the linear models are  $\mathbf{A}$ -Hessian dominated. Moreover, when the data is normalized to a constant level,  $\text{tr}(\mathbf{A})$  is much smaller and dimension-free. This result suggests only transmitting  $\mathcal{O}(1)$ -bits information using CORE without lowering the convergence rate in expectation under suitable conditions. We shall mention that a similar idea of Hessian domination is also considered by Freund et al. (2022) in the Langevin sampling algorithm, who instead proposes a squared Hessian domination condition.

We first consider the  $\mu$ -strongly convex case. Theorem 4.2 below provides a linear convergence results for Algorithm 2.

**Theorem 4.2.** Suppose  $f$  is  $\mu$ -strongly convex,  $L$ -smooth, and  $\mathbf{A}$ -Hessian dominated. Let  $h_k = \frac{m}{4\text{tr}(\mathbf{A})}$ . Then, under the hyper-parameter setting in Algorithm 2,  $\{\mathbf{x}^k\}_{k \in \mathbb{N}}$  satisfy for all  $k \geq 0$

$$\mathbb{E}f(\mathbf{x}^{k+1}) - f^* \leq \left(1 - \frac{3m\mu}{16\text{tr}(\mathbf{A})}\right) (f(\mathbf{x}^k) - f^*). \quad (8)$$

**Remark 4.3.** According to Theorem 4.2, our total communication costs are  $\mathcal{O}\left(\frac{\text{tr}(\mathbf{A})}{\mu} \log \frac{1}{\epsilon}\right)$  in expectation. As we have mentioned, high probability results can also be obtained with additional logarithmic factors, which we simply omit here.

**Remark 4.4.** We compare CORE-GD with the vanilla CGD algorithm which has total communication costs  $\mathcal{O}\left(\frac{dL}{\mu} \log \frac{1}{\epsilon}\right)$ . CORE-GD achieves provably lower communication costs since we always have

$\text{tr}(\mathbf{A}) \leq dL$  when ignoring constants. CORE-GD is also better than DIANA (Mishchenko et al., 2019) whose total communication cost is  $\mathcal{O}(d + \frac{dL}{n\mu})$  when  $d$  is extremely larger than  $n$ . The communication cost remains unchanged under different communication budgets  $m$ . When  $m = \Theta\left(\frac{\text{tr}(\mathbf{A})}{L}\right)$ , CORE-GD achieves the same number of communication rounds (convergence rate) as those of CGD when ignoring constants. Bigger communication budget cannot accelerate the convergence rate.

Next we present realizable conditions for linear models that ensure  $\text{tr}(\mathbf{A})$  to be small. We consider the objective admits the so-called ridge-separable form Freund et al. (2022):

$$f(\mathbf{x}) \equiv \frac{1}{N} \sum_{i=1}^N \sigma_i(\beta_i^\top \mathbf{x}) + \frac{\alpha}{2} \|\mathbf{x}\|^2. \quad (9)$$

Here, we simply consider the  $\ell_2$  norm regularizer. It is possible to generalize our results using proximal algorithms for other regularizers. In (9),  $\beta_i$  is associated with the data, and  $\sigma_i$  is associated with the loss function. We make the following assumptions:

**Assumption 4.5.** The functions  $\sigma_i \in \mathcal{C}^2$  has bounded second derivatives:  $\sigma_i'' \leq L_0$  for all  $i \in [n]$ .

**Assumption 4.6.** For all  $i \in [N]$ , then norm of  $\beta_i$  is bounded by  $R$ :  $\|\beta_i\|^2 \leq R$ .

Note that Assumption 4.6 can be realized by normalizing the data and Assumption 4.5 only requires that the loss functions have a bounded second derivative. We show that  $\text{tr}(\mathbf{A})$  is small:

**Lemma 4.7.** For the objective function in form of (9), under Assumptions 4.5 and 4.6, then  $f$  is  $\mathbf{A}$ -Hessian dominated and  $\mathbf{A}$  satisfies

$$\text{tr}(\mathbf{A}) \leq d\alpha + L_0R. \quad (10)$$

With Lemma 4.7, we show CORE-GD ensures much low communication costs for linear models under suitable conditions.

**Corollary 4.8.** For the objective function in form of (9), under Assumptions 4.5 and 4.6, with  $\text{tr}(\mathbf{A})$  defined in (10), the total communication costs of CORE-GD are  $\mathcal{O}\left(\left(d + \frac{L_0R}{\alpha}\right) \log \frac{1}{\epsilon}\right)$ .

**Remark 4.9.** From Corollary 4.8, treated  $R$  and  $L_0$  as constants, the total communication costs of CORE-GD are  $\tilde{\mathcal{O}}(d + \alpha^{-1})$ , whereas the vanilla CGD requires  $\tilde{\mathcal{O}}(d\alpha^{-1})$  communication costs. Here  $\alpha^{-1}$  can be considered as the condition number of the objective since  $L$  can be  $\Theta(1)$ . CORE-GD greatly reduces the communication costs by the factor of  $\min(d, \alpha^{-1})$ .

We also consider the acceleration of our algorithm. Specifically, we consider Heavy-ball (Polyak, 1964) acceleration for CORE-GD for quadratic objective functions in Appendix B. From Theorem B.1, the total communication costs to find an  $\epsilon$ -approximate solution in linear regression model for CORE-AGD are  $\tilde{\mathcal{O}}\left(\frac{\sum_{i=1}^d \lambda_i^{1/2}}{\mu^{1/2}}\right)$ , which is better than  $\tilde{\mathcal{O}}\left(d + \frac{dL^{1/2}}{\mu^{1/2}}\right)$  because  $\frac{\sum_{i=1}^d \lambda_i^{1/2}}{\mu^{1/2}} \leq \frac{d^{1/2} \text{tr}(\mathbf{A})}{\mu^{1/2}}$ .

When  $d$  is large and the trace of Hessian is bounded, this result is better than  $\tilde{\mathcal{O}}\left(d + \frac{dL^{1/2}}{\mu^{1/2}}\right)$ . The convergenc rate of CORE-AGD is also better than  $\tilde{\mathcal{O}}\left(\frac{\sum_{i=1}^d A_{ii}^{1/2}}{\mu^{1/2}}\right)$  because  $\sum_{i=1}^d \lambda_i^{1/2} \leq \sum_{i=1}^d A_{ii}^{1/2}$  when  $\mathbf{A}$  is semi-definite. Moreover, when  $m = \Theta\left(\frac{\sum_{i=1}^d \lambda_i^{1/2}}{L^{1/2}}\right)$ , CORE-AGD achieves the same number of communication rounds as those of Centralized AGD with ignoring logarithmic factors.

## 5 CORE-GD FOR NON-CONVEX OPTIMIZATION

In this section, we study CORE-GD on general non-convex problems. To explore the information on Hessian matrices, we further assume that  $f$  has  $H$ -Lipschitz continuous Hessian matrices. We will characterize the complexities of our algorithm in terms of  $r_1(f)$ , which is often much smaller than  $dL$  (see Figure 4 taken from Sagun et al. (2016) and empirical results in related papers, e.g. Sagun et al. (2017); Ghorbani et al. (2019); Brock et al. (2018)). For problems where  $r_{1/2}$  is bounded, the results are shown in Appendix D.

Apart from linear models, a broader range of learning models exhibit a restricted  $r_1(f)$ . We illustrate it with the two-layer neural network model presented below:



**Proposition 5.1.** Define  $f(\mathbf{W}, \mathbf{w}) = \mathbf{w}^\top \sigma(\mathbf{W}\mathbf{x})$ , where  $\sigma$  is the activation function. When  $\|\mathbf{x}\|_1 \leq a_1$ ,  $\|\mathbf{w}\| \leq a_2$  and  $\sigma''(x) \leq \alpha$ , we have  $\text{tr}(\nabla^2 f(\mathbf{W}, \mathbf{w})) \leq \alpha a_1 a_2$ .

Moreover, we notice that for many parameterized models,  $r_1(f)$  is limited at least when the parameter is close to its optimal solution. The reason is that under weak regular conditions, the fisher information  $\mathcal{I}(\theta) = -\mathbb{E} \left[ \frac{\partial^2}{\partial \theta^2} \log f(\mathbf{X}; \theta) | \theta \right] = \mathbb{E} \left[ \left( \frac{\partial}{\partial \theta} \log f(\mathbf{X}; \theta) \right)^2 | \theta \right]$ . So when  $\frac{\partial}{\partial \theta} \log f(\mathbf{X}; \theta)$  is bounded,  $r_1(f)$  is also bounded. This assurance broadens the scope of applications for our results.

We consider the CORE-Gradient Descent algorithm with some adaptations. The algorithm is shown in Algorithm 4 in Appendix C. Specifically, we take a careful choice of the step size, and give the communication costs under two options. Moreover, we add one more comparison step, for example,  $\mathbf{x}^{k+1} \leftarrow \arg\min_{\mathbf{x} \in \{\mathbf{x}_k, \bar{\mathbf{x}}_{k+1}\}} f(\mathbf{x})$ . The step requires only one more round of communication with  $\mathcal{O}(1)$  communication costs. The theoretical results are presented as follows:

**Theorem 5.2.** Assume that  $f(\mathbf{x})$  is  $L$ -smooth and has  $H$ -Lipschitz continuous Hessian matrix. With the assumption of  $\text{tr}(\nabla^2 f(\mathbf{x})) \leq r_1$  for any  $\mathbf{x} \in \mathbb{R}^d$  and  $f(\mathbf{x}^0) - f^* \leq \Delta$ . Then, under the hyper-parameter setting in Algorithm 4, the following result in expectation

$$\mathbb{E}f(\mathbf{x}^k) \leq f(\mathbf{x}^0) - \sum_{i=1}^k \mathbb{E} \left[ \frac{h_i}{2} \|\nabla f(\mathbf{x}^i)\|^2 \right] \quad (11)$$

holds for option II, and holds with probability  $1 - \delta$  for option I.

**Remark 5.3.** With Theorem 4, we give the convergence rate and total communication costs of CORE-GD.

- For Option I, CORE-GD needs  $\mathcal{O} \left( \max \left\{ \frac{\Delta r_1(f)}{m\epsilon^2}, \frac{\Delta H^{1/2} d^{3/4}}{m^{3/4} \epsilon^{3/2}} \right\} \right)$  rounds to find an  $\epsilon$ -stationary point with probability  $1 - \delta$ . The total communication costs of CORE-GD are

$$\mathcal{O} \left( \max \left\{ \frac{\Delta r_1(f)}{\epsilon^2}, \frac{\Delta H^{1/2} d^{3/4} m^{1/4}}{\epsilon^{3/2}} \right\} \right).$$

- For Option II, CORE-GD needs  $\mathcal{O} \left( \max \left\{ \frac{\Delta r_1(f)}{m\epsilon^2}, \frac{\Delta^{5/4} L^{1/4} H^{1/2} d^{3/4}}{m^{3/4} \epsilon^2} \right\} \right)$  rounds to find an  $\epsilon$ -stationary point in high probability. The total communication costs of CORE-GD are

$$\mathcal{O} \left( \max \left\{ \frac{\Delta r_1(f)}{\epsilon^2}, \frac{\Delta^{5/4} L^{1/4} H^{1/2} d^{3/4} m^{1/4}}{\epsilon^2} \right\} \right).$$

**Remark 5.4.** Let us compare CORE-GD with Option I with vanilla CGD. The communication costs of CGD to find an  $\epsilon$ -stationary point is  $\tilde{\mathcal{O}}(dL\Delta\epsilon^{-2})$ . Treated  $L, H, \Delta$  as constants, when the per-round communication budget  $m = \Theta \left( \frac{\text{tr}(r_1(f))}{L} \right)$ , CORE-GD achieves the same number of communication rounds (convergence rate) as those of CGD, CORE-GD with Option I reduces the communication costs by a factor of  $\min(dL/r_1, \epsilon^{-0.5} d^{1/4})$  when ignoring logarithmic factors.

## 6 CONCLUSION

In this paper, we propose the CORE technique to transmit information in distributed optimization which can dramatically reduce communication costs. We propose our CORE technique based on the common random variables, which provably reduce the quantities of information transmitted, and apply CORE to two distributed tasks. We prove that our CORE-based algorithms achieve lower communication costs. And by choosing the proper communication budget  $m$ , our algorithms can achieve the same number of communication rounds as those of uncompressed algorithms. In a word, CORE provides new insights and opens the door for designing provably better compression methods in distributed optimization.

## REFERENCES

Alham Fikri Aji and Kenneth Heafield. Sparse communication for distributed gradient descent. In *Proceedings of the 2017 Conference on Empirical Methods in Natural Language Processing*.

- Association for Computational Linguistics, 2017. doi: 10.18653/v1/d17-1045. URL <https://doi.org/10.18653/v1/d17-1045>.
- Dan Alistarh, Demjan Grubic, Jerry Li, Ryota Tomioka, and Milan Vojnovic. Qsgd: Communication-efficient sgd via gradient quantization and encoding. *Advances in Neural Information Processing Systems*, 30, 2017.
- Zeyuan Allen-Zhu, Zheng Qu, Peter Richtárik, and Yang Yuan. Even faster accelerated coordinate descent using non-uniform sampling. In *International Conference on Machine Learning*, pp. 1110–1119. PMLR, 2016.
- C-C Yao Andrew. Some complexity questions related to distributed computing. In *Proc. 11th STOC*, pp. 209–213, 1979.
- Jeremy Bernstein, Yu-Xiang Wang, Kamyar Azizzadenesheli, and Animashree Anandkumar. signsgd: Compressed optimisation for non-convex problems. In *International Conference on Machine Learning*, pp. 560–569. PMLR, 2018.
- Aleksandr Beznosikov, Samuel Horváth, Peter Richtárik, and Mher Safaryan. On biased compression for distributed learning. *arXiv preprint arXiv:2002.12410*, 2020.
- Andrew Brock, Jeff Donahue, Karen Simonyan, and A. Large scale gan training for high fidelity natural image synthesis. *arXiv preprint arXiv:1809.11096*, 2018.
- Yair Carmon, John C Duchi, Oliver Hinder, and Aaron Sidford. Lower bounds for finding stationary points II: first-order methods. *Mathematical Programming*, 185(1):315–355, 2021.
- Chih-Chung Chang. Libsvm data: Classification, regression, and multi-label. <http://www.csie.ntu.edu.tw/~cjlin/libsvmtools/datasets/>, 2008.
- Moses Charikar, Kevin Chen, and Martin Farach-Colton. Finding frequent items in data streams. *Theoretical Computer Science*, 312(1):3–15, 2004.
- Andrew Cotter, Ohad Shamir, Nati Srebro, and Karthik Sridharan. Better mini-batch algorithms via accelerated gradient methods. *Advances in neural information processing systems*, 24, 2011.
- Cynthia Dwork. Differential privacy. In *Automata, Languages and Programming: 33rd International Colloquium, ICALP 2006, Venice, Italy, July 10-14, 2006, Proceedings, Part II 33*, pp. 1–12. Springer, 2006.
- Fartash Faghri, Iman Tabrizian, Ilia Markov, Dan Alistarh, Daniel M Roy, and Ali Ramezani-Kebrya. Adaptive gradient quantization for data-parallel sgd. *Advances in neural information processing systems*, 33:3174–3185, 2020.
- Ilyas Fatkhullin, Igor Sokolov, Eduard Gorbunov, Zhize Li, and Peter Richtárik. Ef21 with bells & whistles: Practical algorithmic extensions of modern error feedback. *arXiv preprint arXiv:2110.03294*, 2021.
- Yoav Freund, Yi-An Ma, Tong Zhang, and A. When is the convergence time of langevin algorithms dimension independent? a composite optimization viewpoint. *Journal of Machine Learning Research*, 23(214):1–32, 2022.
- Behrooz Ghorbani, Shankar Krishnan, Ying Xiao, and A. An investigation into neural net optimization via hessian eigenvalue density. In *International Conference on Machine Learning*, pp. 2232–2241. PMLR, 2019.
- Eduard Gorbunov, Konstantin P Burlachenko, Zhize Li, and Peter Richtárik. Marina: Faster non-convex distributed learning with compression. In *International Conference on Machine Learning*, pp. 3788–3798. PMLR, 2021.
- Rémi Gribonval, Antoine Chatalic, Nicolas Keriven, Vincent Schellekens, Laurent Jacques, and Philip Schniter. Sketching datasets for large-scale learning (long version). *arXiv preprint arXiv:2008.01839*, 2020.

- Kaja Gruntkowska, Alexander Tyurin, and Peter Richtárik. Ef21-p and friends: Improved theoretical communication complexity for distributed optimization with bidirectional compression. *arXiv preprint arXiv:2209.15218*, 2022.
- Filip Hanzely, Konstantin Mishchenko, Peter Richtárik, and A. Sega: Variance reduction via gradient sketching. *Advances in Neural Information Processing Systems*, 31, 2018.
- Kaiming He, Xiangyu Zhang, Shaoqing Ren, and Jian Sun. Deep residual learning for image recognition. In *Proceedings of the IEEE conference on computer vision and pattern recognition*, pp. 770–778, 2016.
- Samuel Horváth, Dmitry Kovalev, Konstantin Mishchenko, Peter Richtárik, and Sebastian Stich. Stochastic distributed learning with gradient quantization and double-variance reduction. *Optimization Methods and Software*, 38(1):91–106, 2023.
- Samuel Horvóth, Chen-Yu Ho, Ludovit Horvath, Atal Narayan Sahu, Marco Canini, and Peter Richtárik. Natural compression for distributed deep learning. In *Mathematical and Scientific Machine Learning*, pp. 129–141. PMLR, 2022.
- Daniel Hsu, Sham M Kakade, Tong Zhang, and A. Random design analysis of ridge regression. In *Conference on learning theory*, pp. 9–1. JMLR Workshop and Conference Proceedings, 2012.
- Elena Ikonomovska, Suzana Loshkovska, and Dejan Gjorgjevikj. A survey of stream data mining. 2007.
- Nikita Ivkin, Daniel Rothchild, Enayat Ullah, Ion Stoica, Raman Arora, et al. Communication-efficient distributed sgd with sketching. *Advances in Neural Information Processing Systems*, 32, 2019.
- Jiawei Jiang, Fangcheng Fu, Tong Yang, and Bin Cui. Sketchml: Accelerating distributed machine learning with data sketches. In *Proceedings of the 2018 International Conference on Management of Data*, pp. 1269–1284, 2018.
- Peng Jiang and Gagan Agrawal. A linear speedup analysis of distributed deep learning with sparse and quantized communication. *Advances in Neural Information Processing Systems*, 31, 2018.
- Chi Jin, Praneeth Netrapalli, and Michael I. Jordan. Accelerated Gradient Descent Escapes Saddle Points Faster than Gradient Descent, November 2017. URL <http://arxiv.org/abs/1711.10456>. arXiv:1711.10456 [cs, math, stat].
- Sai Praneeth Karimireddy, Quentin Rebjock, Sebastian Stich, and Martin Jaggi. Error feedback fixes signsgd and other gradient compression schemes. In *International Conference on Machine Learning*, pp. 3252–3261. PMLR, 2019.
- Sai Praneeth Karimireddy, Satyen Kale, Mehryar Mohri, Sashank Reddi, Sebastian Stich, and Ananda Theertha Suresh. Scaffold: Stochastic controlled averaging for federated learning. *International Conference on Machine Learning*, pp. 5132–5143, 2020.
- Sarit Khirirat, Hamid Reza Feyzmahdavian, Mikael Johansson, and B. Distributed learning with compressed gradients. *arXiv preprint arXiv:1806.06573*, 2018.
- Jakub Konečný, H Brendan McMahan, Felix X Yu, Peter Richtárik, Ananda Theertha Suresh, and Dave Bacon. Federated learning: Strategies for improving communication efficiency. *arXiv preprint arXiv:1610.05492*, 2016.
- Jason D Lee, Qihang Lin, Tengyu Ma, and Tianbao Yang. Distributed stochastic variance reduced gradient methods and a lower bound for communication complexity. *arXiv preprint arXiv:1507.07595*, 2015.
- Yin Tat Lee, Zhao Song, Qiuyi Zhang, and A. Solving empirical risk minimization in the current matrix multiplication time. *Conference on Learning Theory*, pp. 2140–2157, 2019.
- Zhize Li and Peter Richtárik. Canita: Faster rates for distributed convex optimization with communication compression. *Advances in Neural Information Processing Systems*, 34:13770–13781, 2021.

- Zhize Li, Dmitry Kovalev, Xun Qian, and Peter Richtárik. Acceleration for compressed gradient descent in distributed and federated optimization. *arXiv preprint arXiv:2002.11364*, 2020.
- Hongzhou Lin, Julien Mairal, and Zaid Harchaoui. A universal catalyst for first-order optimization. *Advances in neural information processing systems*, 28, 2015.
- Yujun Lin, Song Han, Huizi Mao, Yu Wang, and William J Dally. Deep gradient compression: Reducing the communication bandwidth for distributed training. *arXiv preprint arXiv:1712.01887*, 2017.
- Artavazd Maranjyan, Mher Safaryan, and Peter Richtárik. Gradskip: Communication-accelerated local gradient methods with better computational complexity. *arXiv preprint arXiv:2210.16402*, 2022.
- Konstantin Mishchenko, Eduard Gorbunov, Martin Takáč, and Peter Richtárik. Distributed learning with compressed gradient differences. *arXiv preprint arXiv:1901.09269*, 2019.
- Konstantin Mishchenko, Filip Hanzely, and Peter Richtárik. 99% of worker-master communication in distributed optimization is not needed. In *Conference on Uncertainty in Artificial Intelligence*, pp. 979–988. PMLR, 2020.
- Konstantin Mishchenko, Grigory Malinovsky, Sebastian Stich, and Peter Richtárik. Proxskip: Yes! local gradient steps provably lead to communication acceleration! finally! *International Conference on Machine Learning*, pp. 15750–15769, 2022.
- Aritra Mitra, Rayana Jaafar, George J Pappas, and Hamed Hassani. Linear convergence in federated learning: Tackling client heterogeneity and sparse gradients. *Advances in Neural Information Processing Systems*, 34:14606–14619, 2021.
- Katta G Murty and Santosh N Kabadi. Some NP-complete problems in quadratic and nonlinear programming. Technical report, 1985.
- Yurii Nesterov. *Introductory lectures on convex optimization: A basic course*, volume 87. Springer Science & Business Media, 2003.
- Ilan Newman. Private vs. common random bits in communication complexity. *Information processing letters*, 39(2):67–71, 1991.
- Mert Pilanci, Martin J. Wainwright, A, and A. Newton sketch: A linear-time optimization algorithm with linear-quadratic convergence. 2015.
- Boris T Polyak. Some methods of speeding up the convergence of iteration methods. *Ussr computational mathematics and mathematical physics*, 4(5):1–17, 1964.
- Peter Richtárik, Igor Sokolov, and Ilyas Fatkhullin. Ef21: A new, simpler, theoretically better, and practically faster error feedback. *Advances in Neural Information Processing Systems*, 34: 4384–4396, 2021.
- Peter Richtárik, Igor Sokolov, Elnur Gasanov, Ilyas Fatkhullin, Zhize Li, and Eduard Gorbunov. 3pc: Three point compressors for communication-efficient distributed training and a better theory for lazy aggregation. In *International Conference on Machine Learning*, pp. 18596–18648. PMLR, 2022.
- Daniel Rothchild, Ashwinee Panda, Enayat Ullah, Nikita Ivkin, Ion Stoica, Vladimir Braverman, Joseph Gonzalez, and Raman Arora. Fetchsgd: Communication-efficient federated learning with sketching. *International Conference on Machine Learning*, pp. 8253–8265, 2020.
- Mher Safaryan and Peter Richtárik. On stochastic sign descent methods. 2019.
- Mher Safaryan, Filip Hanzely, Peter Richtárik, and A. Smoothness matrices beat smoothness constants: Better communication compression techniques for distributed optimization. *Advances in Neural Information Processing Systems*, 34:25688–25702, 2021.
- Levent Sagun, Leon Bottou, Yann LeCun, and A. Eigenvalues of the hessian in deep learning: Singularity and beyond. *arXiv preprint arXiv:1611.07476*, 2016.

- Levent Sagun, Utku Evci, V Ugur Guney, Yann Dauphin, and Leon Bottou. Empirical analysis of the hessian of over-parametrized neural networks. *arXiv preprint arXiv:1706.04454*, 2017.
- Kevin Scaman, Francis Bach, Sébastien Bubeck, Yin Tat Lee, and Laurent Massoulié. Optimal algorithms for smooth and strongly convex distributed optimization in networks. In Doina Precup and Yee Whye Teh (eds.), *Proceedings of the 34th International Conference on Machine Learning*, volume 70 of *Proceedings of Machine Learning Research*, pp. 3027–3036. PMLR, 06–11 Aug 2017a. URL <https://proceedings.mlr.press/v70/scaman17a.html>.
- Kevin Scaman, Francis Bach, Sébastien Bubeck, Yin Tat Lee, and Laurent Massoulié. Optimal algorithms for smooth and strongly convex distributed optimization in networks. In *international conference on machine learning*, pp. 3027–3036. PMLR, 2017b.
- Frank Seide, Hao Fu, Jasha Droppo, Gang Li, and Dong Yu. 1-bit stochastic gradient descent and its application to data-parallel distributed training of speech dnns. In *Fifteenth annual conference of the international speech communication association*, 2014.
- Shaohuai Shi, Qiang Wang, Kaiyong Zhao, Zhenheng Tang, Yuxin Wang, Xiang Huang, and Xiaowen Chu. A distributed synchronous sgd algorithm with global top-k sparsification for low bandwidth networks. In *2019 IEEE 39th International Conference on Distributed Computing Systems (ICDCS)*, pp. 2238–2247. IEEE, 2019.
- Wei Shi, Qing Ling, Gang Wu, and Wotao Yin. Extra: An exact first-order algorithm for decentralized consensus optimization. *SIAM Journal on Optimization*, 25(2):944–966, 2015.
- Sebastian U Stich and Sai Praneeth Karimireddy. The error-feedback framework: Better rates for sgd with delayed gradients and compressed communication. *arXiv preprint arXiv:1909.05350*, 2019.
- Hanlin Tang, Chen Yu, Xiangru Lian, Tong Zhang, and Ji Liu. Doublesqueeze: Parallel stochastic gradient descent with double-pass error-compensated compression. In *International Conference on Machine Learning*, pp. 6155–6165. PMLR, 2019.
- Hanlin Tang, Shaoduo Gan, Ammar Ahmad Awan, Samyam Rajbhandari, Conglong Li, Xiangru Lian, Ji Liu, Ce Zhang, and Yuxiong He. 1-bit adam: Communication efficient large-scale training with adam’s convergence speed. In *International Conference on Machine Learning*, pp. 10118–10129. PMLR, 2021.
- Alexander Tyurin and Peter Richtárik. Dasha: Distributed nonconvex optimization with communication compression, optimal oracle complexity, and no client synchronization. *arXiv preprint arXiv:2202.01268*, 2022.
- Shay Vargaftik, Ran Ben-Basat, Amit Portnoy, Gal Mendelson, Yaniv Ben-Itzhak, and Michael Mitzenmacher. Drive: One-bit distributed mean estimation. *Advances in Neural Information Processing Systems*, 34:362–377, 2021.
- Thijs Vogels, Sai Praneeth Karimireddy, and Martin Jaggi. Powersgd: Practical low-rank gradient compression for distributed optimization. *Advances in Neural Information Processing Systems*, 32, 2019.
- Hongyi Wang, Scott Sievert, Shengchao Liu, Zachary Charles, Dimitris Papailiopoulos, and Stephen Wright. Atomo: Communication-efficient learning via atomic sparsification. *Advances in Neural Information Processing Systems*, 31, 2018.
- Jianqiao Wangni, Jialei Wang, Ji Liu, and Tong Zhang. Gradient sparsification for communication-efficient distributed optimization. *Advances in Neural Information Processing Systems*, 31, 2018.
- Wei Wen, Cong Xu, Feng Yan, Chunpeng Wu, Yandan Wang, Yiran Chen, and Hai Li. Terngrad: Ternary gradients to reduce communication in distributed deep learning. *Advances in neural information processing systems*, 30, 2017.
- David P Woodruff et al. Sketching as a tool for numerical linear algebra. *Foundations and Trends® in Theoretical Computer Science*, 10(1–2):1–157, 2014.

Jiaxiang Wu, Weidong Huang, Junzhou Huang, and Tong Zhang. Error compensated quantized sgd and its applications to large-scale distributed optimization. In *International Conference on Machine Learning*, pp. 5325–5333. PMLR, 2018.

Pengyun Yue, Long Yang, Cong Fang, and Zhouchen Lin. Zeroth-order optimization with weak dimension dependency. 2023.

## A RELATED WORK

**Gradient compression.** Gradient compression is the main technique to reduce communication complexity during the process of training. One of the representative achievements is the gradient quantization, for example, 1-bit SGD (Seide et al., 2014) and 1-bit Adam (Tang et al., 2021), which heuristically compresses each component of the gradient into an integer that can be encoded in a few bits. On this basis, TernGrad (Wen et al., 2017), QSGD (Alistarh et al., 2017), ECQ-SGD (Wu et al., 2018), ALQ (Faghri et al., 2020), Natural Compression (Horvath et al., 2022) and DIANA (Mishchenko et al., 2019) further improved the gradient quantization by adding hyperparameters or combining with the adaptive technique to control the compression ratio. Another main technique is gradient sparsification, which transmits the main dimensions of the gradient instead of the whole. Top-K (Wangni et al., 2018; Shi et al., 2019; Jiang & Agrawal, 2018) was the main idea of gradient sparsification which chose the first  $k$  larger dimensions of the gradient to transmit. Gradient Dropping (Aji & Heafield, 2017), DGC (Lin et al., 2017), Atomo (Wang et al., 2018) and IBCD (Mishchenko et al., 2020) obtained better results on this basis. In addition, some new techniques based on other ideas have also been developed and achieved good results. For example, PowerSGD (Vogels et al., 2019) proposed a new low-rank gradient compressor. SignSGD (Bernstein et al., 2018; Safaryan & Richtarik, 2019) proposed a sign-based method with simple compression rules. A biased contractive compressor Beznosikov et al. (2020), a general class of unbiased quantization operators (Horvath et al., 2023) and three-point compressors (3PC) (Richtarik et al., 2022) were also proposed as innovative new achievements. However, the second moments of these estimations are often of order  $d$ , which implies a restriction of the total communication costs.

**Random sketching.** Sketching (Gribonval et al., 2020; Woodruff et al., 2014; Ikononovska et al., 2007) is a widely-used technique in machine learning, data mining, and optimization, whose core idea is to reduce the scale by a probabilistic data structure to approximate the data to reduce the computation costs. It is worth noticing that some researchers have started to use the sketching technique to reduce communication costs during the process of training. Specifically, Konecny et al. (2016) proposed FedAvg to reduce the communication costs, which uses a random subset of the value of the full gradient to communicate. They call this method sketched update and integrate quantization (before random sketch) in experiments. Jiang et al. (2018) also proposed a quantization-based sketched gradient compression method, which divides the values of the gradient into four buckets bounded by quantiles and encodes them. However, there is a lack of theoretical guarantees in the convergence of these algorithms, and these methods are still based on random sampling and heuristic quantization encoding. Moreover, Ivkin et al. (2019) proposed SKETCHED-SGD, which uses Count Sketch (Charikar et al., 2004) to compress the gradient. They also presented a theoretical analysis of convergence, but compared with vanilla SGD, it requires an  $\tilde{O}(\frac{1}{T} + \frac{d^2}{k^2T^2} + \frac{d^3}{k^3T^3})$  (where  $d$  is the dimension of gradient and  $k$  is a fixed parameter satisfying  $k \leq d$ ) convergence rate. When  $d$  is large, it is much worse than SGD. Rothchild et al. (2020) proposed FetchSGD which combines Count Sketch (Charikar et al., 2004) and Top- $k$  (Lin et al., 2017) for  $k$ -sparsification. It requires the same convergence rate as SGD for non-convex objective functions, but the communication cost is also dependent on  $d$  at least. Hanzely et al. (2018) proved that when adding biased estimates on the basis of random matrix sketching, their algorithm achieves a faster convergence rate and can be accelerated. However, they did not come up with a specific sketching method. Moreover, Lee et al. (2019) and Pilanci et al. (2015) proposed some sketched Hessian-based second-order optimization algorithms. In this work, we mainly focus on gradient-based communication-efficient methods.

**Distributed optimization.** Distributed machine learning and optimization have developed rapidly in recent years. In the early years, the main achievements were based on the existing optimization algorithms, such as SGD with mini-batch (Cotter et al., 2011), DSVRG (Lee et al., 2015), EXTRA (Shi et al., 2015) and MSDA (Scaman et al., 2017b). In recent years, it is worth noticing that some compressed distributed optimization methods have been proposed. Inspired by the results of coordinate gradient descent, Safaryan et al. (2021); Hanzely et al. (2018) proposed a compressed gradient descent framework based on the idea of random projection, achieving an  $\tilde{O}(\frac{\sum_{i=1}^d M_{ii}^{1/2}}{\mu^{1/2}})$  communication complexity as Allen-Zhu et al. (2016) for  $M$ -Hessian dominated and  $\mu$ -strongly convex function where  $M_{ii}$  is the entry in  $i$ -th row and  $i$ -th column of the matrix  $M$ , but their achievements are lack of a concrete projection compression method. Moreover, some compressed gradient descent algorithms based on compression techniques mentioned above were also proposed, such as DCGD (Khirirat et al., 2018), DIANA (Mishchenko et al., 2019), MARINA (Gorbunov

et al., 2021), DASHA (Tyurin & Richtárik, 2022) and CANITA (Li & Richtárik, 2021). Li et al. (2020) proposed an accelerated distributed algorithm which achieved  $\tilde{\mathcal{O}}(d + \frac{dL^{1/2}}{n\mu^{1/2}})$  considering the setting that the dimension  $d$  is extremely larger than  $n$ , whose lower bound is  $\tilde{\mathcal{O}}(d + \frac{d^{1/2}L^{1/2}}{\mu^{1/2}})$ . It is worth noticing that in practice  $d$  is often extremely large. So there is still a lack of a concrete compression technique and corresponding distributed algorithm that achieves low communication complexity when  $d$  is large. And our work fills this gap. In addition, error feedback technique (Stich & Karimireddy, 2019; Karimireddy et al., 2019; Tang et al., 2019; Gruntkowska et al., 2022; Richtárik et al., 2021; Fatkhullin et al., 2021) was also widely used in compressed distributed optimization.

**Federated learning.** Federated Learning is another machine learning setting concentrating on communication costs, where the goal is to train a high-quality centralized model while training data remains distributed over a large number of clients each with unreliable and relatively slow network connections. In federated learning communication bandwidth is a dominating bottleneck and how to design a communication-efficient algorithm has been a concern for researchers. In the early years, some federated learning algorithms have been proposed. These methods are often based on local gradient and heuristic gradient compressors to reduce one-step communication cost, such as FedAvg (Konečný et al., 2016), FetchSGD (Rothchild et al., 2020), SKETCHED-SGD (Ivkin et al., 2019), SCAFFOLD (Karimireddy et al., 2020) and FedLin (Mitra et al., 2021). However, the approximation of local gradient often results in a loss of convergence rate. The total communication costs are worse than, or at best matching that of vanilla gradient descent. Recently, some new communication-efficient methods such as Scaffnew (Mishchenko et al., 2022) and GradSkip (Maranjyan et al., 2022) have been proposed to achieve the same communication rounds as the lower bound of smooth and strongly-convex objective functions  $\mathcal{O}(\sqrt{\kappa})$ , but the total communication costs are still  $\mathcal{O}(d)$ .

**Random communication complexity.** In theoretical computer science, communication complexity studies the amount of communication needed to solve a problem when input data is distributed among several parties. Communication complexity was first proposed in Andrew (1979). Andrew (1979) also defined randomized protocol and randomized communication complexity. In a randomized protocol, parties are given a common random string as the input to a deterministic protocol. Random protocols can determine the answer in high probability with much less amount of information transmitted, so randomized communication complexity is much lower than deterministic communication complexity in expectation. Inspired by the advantage of randomized protocols over deterministic ones, we designed a random compression method for distributed optimization which is faster in expectation. Newman (1991) proved that any protocol using a common random string can be simulated by a private random string protocol, with an extra  $\mathcal{O}(\log n)$  bits.

## B ACCELERATION OF CORE-GD ON LINEAR MODELS

In the optimization community, the momentum technique is used to accelerate convergence of Gradient Descent. We also design an accelerated CORE-based algorithm. We name the algorithm as CORE-Accelerated Gradient Descent (CORE-AGD). Here we simply consider the objective function to be quadratic, i.e.

$$f(\mathbf{x}) = \frac{1}{2} \mathbf{x}^\top \mathbf{A} \mathbf{x}. \quad (12)$$

This corresponds to picking  $\sigma_i$  as quadratic in linear models. We also note that the quadratic function is already very representative, as it is known that most worst-case functions (lower-bound instances) in the convex optimization are exactly quadratic (see e.g. Nesterov (2003, Chapter 2)). As we have mentioned, our analysis can be directly extended to general convex optimization under an additional Hessian smoothness condition combining with higher-order methods. We present our algorithm in Algorithm 3, which is a heavy-ball (Polyak, 1964) based algorithm by replacing the gradient to be its estimation using CORE.

By a careful analysis of the CORE-AGD algorithm, we have the following theorem:

**Theorem B.1.** *For objective in form of (12), let  $\{\lambda_i\}_{i=1}^d$  be the eigenvalues of  $\mathbf{A}$  with a decreasing order, and denote  $L = \lambda_1$ ,  $\mu = \lambda_d$ . Under the hyper-parameter setting in Algorithm 3, we have*

$$\mathbb{E}f(\mathbf{x}^N) \leq 400 \left( 1 - \frac{1}{57600} \frac{m\mu^{1/2}}{\sum_{i=1}^d \lambda_i^{1/2}} \right)^N \cdot \frac{L}{\mu} \cdot f(\mathbf{x}^0). \quad (15)$$



**Algorithm 3** CORE-AGD

**Require:**  $n$  machines, a central machine, a common random number generator,  $m \leq \frac{\text{tr}(\mathbf{A})}{L}$ ,  $x^0$ ,

$$k = 0, \beta \leftarrow \sqrt{h\mu}, h \leftarrow \frac{m^2}{14400^2(\sum_i \lambda_i^{1/2})^2}$$

**while**  $k \leq N$  **do**

Generate fresh i.i.d.  $m$  Gaussian vectors  $\xi_1, \dots, \xi_m$  with the common random number generator.

Machine  $i$  computes  $\mathbf{y}^k = \mathbf{x}^k + (1 - \beta)(\mathbf{x}^k - \mathbf{x}^{k-1})$  and sends  $p_{ij} = \langle \nabla f_i(\mathbf{y}^k), \xi_j \rangle$  to the central machine.

The central machine sends  $\sum_{i=1}^n p_{ij}$  back to every machine.

Machines reconstruct  $\tilde{\nabla}_m f(\mathbf{y}^k)$  by

$$\tilde{\nabla}_m f(\mathbf{x}^k) = \frac{1}{m} \sum_{i=1}^n \sum_{j=1}^m p_{ij} \xi_j \quad (13)$$

Machines update  $\mathbf{x}_k$  by  $\tilde{\nabla}_m f(\mathbf{y}^k)$  as

$$\mathbf{x}^{k+1} = \mathbf{y}^k - h \tilde{\nabla}(\mathbf{y}^k) \quad (14)$$

**end while**

In Theorem B.1, if  $f$  is not strongly-convex ( $\lambda_d = 0$ ) or  $\lambda_d$  is too small, i.e. ( $\lambda < \epsilon$ ), we can also use the reduction technique (see e.g. Lin et al. (2015)) by adding a regularization term. From Theorem B.1, the total communication costs to find an  $\epsilon$ -approximate solution for CORE-AGD are  $\tilde{\mathcal{O}}\left(\frac{\sum_{i=1}^d \lambda_i^{1/2}}{\mu^{1/2}}\right)$ . In contrast, the communication costs of CAGD are  $\tilde{\mathcal{O}}\left(\frac{d\lambda_1^{1/2}}{\mu^{1/2}}\right)$ . Again, we

obtain a provably better communication costs because  $\frac{\sum_{i=1}^d \lambda_i^{1/2}}{\mu^{1/2}} \leq \frac{dL^{1/2}}{\mu^{1/2}}$  when ignoring logarithmic factors. And when  $m = \Theta\left(\frac{\sum_{i=1}^d \lambda_i^{1/2}}{L^{1/2}}\right)$ , CORE-AGD achieves the same number of communication rounds (convergence rate) as those of CAGD when ignoring logarithmic factors. We then specify the objective to satisfy the ridge-separable form (9) with  $\sigma_i$  being a quadratic function. We have Corollary B.2, which states that CORE-AGD reduces the communication costs by a  $\sqrt{\min(d, \alpha^{-1})}$  factor compared with the ‘‘worst-case-optimal’’ CAGD algorithm.

**Corollary B.2.** *For the objective function in form of (9) with  $\sigma_i$  being a quadratic function, under Assumptions 4.6 with  $R$  treated as a constant, the total communication costs of CORE-AGD are  $\tilde{\mathcal{O}}\left(d + \frac{\sqrt{dL_0R}}{\alpha}\right)$ .*

## C CORE-GD FOR NON-CONVEX OPTIMIZATION: ALGORITHM

In this section, we present the CORE-GD algorithm for non-convex optimization problem in Algorithm 4. Specifically, we take a careful choice of the step size, and give the communication costs under two options. Moreover, we add one more comparison step, i.e.  $\mathbf{x}^{k+1} \leftarrow \arg\min_{\mathbf{x} \in \{\mathbf{x}_k, \bar{\mathbf{x}}_{k+1}\}} f(\mathbf{x})$ . The step requires only one more round of communication with  $\mathcal{O}(1)$  communication costs.

## D ACCELERATION OF CORE-GD ON GENERIC CONVEX AND NON-CONVEX PROBLEMS

In this section, we focus on generic optimization problems, where the objective function is  $L$ -smooth and have an  $H$ -Lipschitz continuous Hessian matrix. We focus on the settings where  $\frac{r_{1/2}(f)}{L^{1/2}}$  is small, and obtain optimal communication costs in terms of  $\epsilon$  while reducing the dominating dimension term  $d$  to  $\frac{r_{1/2}(f)}{L^{1/2}}$ .

**Algorithm 4** CORE-GD in Non-convex Optimization

---

**Require:**  $n$  machines, a central machine, a common random number generator,  $m \leq \frac{r_1(f)}{L}$ ,  $\mathbf{x}^0$ ,  $k = 0$ , (For Option I,  $m > \log(\frac{N}{\delta})$ )  
 Assume that  $f(\mathbf{x}^0) - f^* \leq \Delta$   
**while**  $k < N$  **do**  
   Generate fresh i.i.d.  $m$  Gaussian vectors  $\xi_1, \dots, \xi_m$  with the common random number generator  
   Machine  $i$  sends  $p_{ij} = \langle \nabla f_i(\mathbf{x}^k), \xi_j \rangle$  to the central machine  
   The central machine sends  $\sum_{i=1}^n p_{ij}$  back to every machine  
   Machines reconstruct  $\tilde{\nabla}_m f(\mathbf{x}^k)$  by  $\tilde{\nabla}_m f(\mathbf{x}^k) = \frac{1}{m} \sum_{i=1}^n \sum_{j=1}^m p_{ij} \xi_j$   
   Let  $p = \frac{1}{m} \sum_{i=1}^m \left( \sum_{j=1}^n p_{ij} \right)$   
    $h_k = \begin{cases} \min\{\frac{m}{16r_1(f)}, \frac{1}{1600} H^{-1/2} p^{-1/2} d^{-3/4} m^{3/4}\}, & \text{Option I} \\ \min\{\frac{m}{16r_1(f)}, \frac{1}{1600} H^{-1/2} (L\Delta)^{-1/4} d^{-3/4} m^{3/4}\}, & \text{Option II} \end{cases}$   
    $\tilde{\mathbf{x}}^{k+1} = \mathbf{x}^k - h_k \tilde{\nabla}_m f(\mathbf{x}^k)$   
    $\mathbf{x}^{k+1} \leftarrow \operatorname{argmin}_{\mathbf{x} \in \{\mathbf{x}^k, \tilde{\mathbf{x}}_{k+1}\}} f(\mathbf{x})$   
    $k \leftarrow k + 1$   
**end while**

---

The key observation is that algorithms using CORE to compress and reconstruct gradient information can be implemented by zeroth-order oracles, instead of first-order oracles. Indeed, one can approximately compute  $p = \langle \nabla f(\mathbf{x}), \xi \rangle$  by

$$p \approx \frac{f(\mathbf{x} + \rho \cdot \xi) - f(\mathbf{x})}{\rho}, \quad (16)$$

where  $\rho \rightarrow 0$ . Therefore, we can directly adapt the zeroth-order algorithms from (Yue et al., 2023), where the gradient is also estimated using (16). We first introduce the definition of  $D$ -bounded distance to the optimal solution and  $(\epsilon, \delta)$ -SSP as follows. Then we have Theorem D.3 and Theorem D.4.

**Definition D.1** ( $D$ -bounded distance to the optimal solution). Assume the minimizer of  $f$  exists and  $\mathbb{X}^*$  is the set of all minimizers. Define  $D = \inf_{\mathbf{x}^* \in \mathbb{X}^*} \sup\{\|\mathbf{x} - \mathbf{x}^*\| : f(\mathbf{x}) \leq f(\mathbf{x}^*)\}$ .

**Definition D.2**  $(\epsilon, \delta)$ -SSP.  $\mathbf{x}$  is said to be an  $(\epsilon, \delta)$ -approximated second-order stationary point (SSP) of  $f$  if it admits:  $\|\nabla f(\mathbf{x})\| \leq \epsilon$  and  $\nabla^2 f(\mathbf{x}) \succeq -\delta \mathbf{I}$ .

**Theorem D.3.** Assume the objective function  $f$  is convex and has  $L$ -continuous gradient and  $H$ -Lipschitz continuous Hessian matrices. Based on Yue et al. (2023, Algorithm 4), one can find an  $\epsilon$ -approximated solution in

$$\tilde{\mathcal{O}} \left( \frac{D \cdot r_{1/2}(f)}{\epsilon^{1/2}} + d \cdot D^{6/7} H^{2/7} \epsilon^{-2/7} \right) \quad (17)$$

communication costs with high probability.

**Theorem D.4.** Assume the objective function  $f$  is non-convex and has  $L$ -continuous gradients and  $H$ -Lipschitz continuous Hessian matrices. Based on Yue et al. (2023, Algorithm 8), one can find an  $(\epsilon, \sqrt{H\epsilon})$ -Second-order stationary point of  $f$  in

$$\tilde{\mathcal{O}} \left( r_{1/2}(f) H^{1/4} \Delta \epsilon^{-7/4} + d H^{1/2} \Delta \epsilon^{-3/2} \right) \quad (18)$$

communication costs with high probability.

**Remark D.5.** The communication costs in Theorem D.3 and Theorem D.4 match the state-of-the-art results in terms of  $\epsilon$ , namely  $\tilde{\mathcal{O}}(\epsilon^{-1/2})$  for convex problems (Nesterov, 2003) and  $\tilde{\mathcal{O}}(\epsilon^{-7/4})$  for non-convex problems (Jin et al., 2017). In the non-convex case, there still exists an  $\epsilon^{-1/28}$  gap between the upper bound and the lower bound (Carmon et al., 2021).

## E DECENTRALIZED CORE BASED ALGORITHMS

In this section, we consider the decentralized optimization settings. In centralized settings, we assume that all the machines can send the gradient to the central machine. However, if machines can only

**Algorithm 5** Decentralized CORE-GD with per-round communication budget  $m$ 

**Require:**  $n$  machines, a central machine, a common random number generator,  $m \leq \frac{\text{tr}(\mathbf{A})}{L}$ ,  $\mathbf{x}^0$ ,  $k = 0$ , step-size  $h_k = \frac{m}{4\text{tr}(\mathbf{A})}$ .

**while**  $k < N$  **do**

Generate fresh i.i.d.  $m$  Gaussian vectors  $\xi_1, \dots, \xi_m$  with the common random number generator.

Machine  $i$  computes projections  $p_{ij} = \langle \nabla f_i(\mathbf{x}^k), \xi_j \rangle$  locally. Define  $\mathbf{p}_i = [p_{i1} \ \dots \ p_{im}]^\top$ .  
Machines solve an  $m$ -dimensional subproblem with an decentralized optimization algorithm:

$$\mathbf{p} = \underset{\mathbf{x} \in \mathbb{R}^m}{\text{argmin}} \frac{1}{n} \sum_{i=1}^n \frac{1}{2} \|\mathbf{x} - \mathbf{p}_i\|^2. \quad (19)$$

Denote  $p_j$  to be the  $j$ th coordinate of  $\mathbf{p}$ . Machines reconstruct  $\tilde{\nabla}_m f(\mathbf{x}^k)$  by

$$\tilde{\nabla}_m f(\mathbf{x}^k) = \frac{n}{m} \sum_{j=1}^m p_j \xi_j, \quad (20)$$

Machines update  $\mathbf{x}^k$  by

$$\mathbf{x}^{k+1} = \mathbf{x}^k - h_k \tilde{\nabla}_m f(\mathbf{x}^k). \quad (21)$$

$k \leftarrow k + 1$ .

**end while**

send messages to their neighbours, a message will be transmitted several times before it reaches the central machine. In the worst case, the total communication costs will be multiplied by the diameter of the graph. In the decentralized settings, the communication costs usually depend on the gossip matrix  $\mathbf{W}$  of the graph. We propose decentralized CORE-GD in Algorithm 5, and analyze its communication costs.

The optimal solution of subproblem (20) is

$$\mathbf{p} = \frac{1}{n} \sum_{i=1}^n \mathbf{p}_i. \quad (22)$$

Therefore, we have

$$p_j = \frac{1}{n} \sum_{i=1}^n p_{ij}. \quad (23)$$

By solving subproblem (20), we broadcast  $p_j$  to every machine in the graph, and each machine can reconstruct the gradient using  $p_j$ . The Hessian matrix of the objective function in (20) is  $\mathbf{I}_m$ , so (20) is simple to optimize. GD will find the optimal solution in one step if (20) can be solved locally. The optimal communication costs of solving (20) to accuracy  $\epsilon$  is  $\mathcal{O}\left(\frac{1}{\sqrt{\gamma}} \log \frac{1}{\epsilon}\right)$ , where  $\gamma$  is the eigengap of the gossip matrix  $\mathbf{W}$  of the graph (see e.g. Scaman et al. (2017a)). Ignoring logarithmic factors, the total communication costs of decentralized CORE-GD are only  $\tilde{\mathcal{O}}\left(\frac{1}{\sqrt{\gamma}}\right)$  times more than the communication costs of centralized CORE-GD in the same setting.

## F DEFERRED PROOFS IN SECTION 3

*Proof of Lemma 3.1.*

$$\begin{aligned} \mathbb{E}_{\xi_1, \dots, \xi_m} \tilde{\mathbf{a}} &= \mathbb{E}_{\xi_1, \dots, \xi_m} \left[ \frac{1}{m} \sum_{i=1}^m \langle \mathbf{a}, \xi_i \rangle \cdot \xi_i \right] \\ &= \mathbb{E}_{\xi_1} \xi_1 \xi_1^\top \mathbf{a} = \mathbf{I} \mathbf{a} \\ &= \mathbf{a} \end{aligned} \quad (24)$$

□

*Proof of Lemma 3.2.* For the simplicity of notation, we use  $\mathbb{E}_\xi$  to denote  $\mathbb{E}_{\xi_1, \dots, \xi_m}$ .

$$\begin{aligned} \mathbb{E}_\xi \|\tilde{\mathbf{a}} - \mathbf{a}\|_{\mathbf{A}}^2 &= \mathbb{E}_\xi \left\| \frac{1}{m} \sum_{i=1}^m (\langle \mathbf{a}, \xi_i \rangle \cdot \xi_i - \mathbf{a}) \right\|_{\mathbf{A}}^2 \\ &= \mathbb{E}_\xi \left[ \frac{1}{m^2} \sum_{i=1}^m (\mathbf{a}^\top \xi_i \xi_i^\top \mathbf{A} \xi_i \xi_i^\top \mathbf{a} - \mathbf{a}^\top \mathbf{A} \mathbf{a}) \right] \\ &= \frac{1}{m} \mathbb{E}_{\xi_1} \mathbf{a}^\top \xi_1 \xi_1^\top \mathbf{A} \xi_1 \xi_1^\top \mathbf{a} - \frac{1}{m} \|\mathbf{a}\|_{\mathbf{A}}^2. \end{aligned} \quad (25)$$

Let  $\mathbf{A} = \mathbf{U}^\top \mathbf{D} \mathbf{U}$  be the eigenvalue decomposition of  $\mathbf{A}$  where  $\mathbf{D} = \text{diag}\{b_1, \dots, b_d\}$  is a diagonal matrix, and  $\zeta = \mathbf{U} \xi_1$  be a linear transformation of the random variable  $\xi_1$ . We have

$$\begin{aligned} \mathbb{E}_{\xi_1} [\xi_1 \xi_1^\top \mathbf{A} \xi_1 \xi_1^\top] &\stackrel{a}{=} \mathbb{E}_\zeta [\mathbf{U}^\top \zeta \zeta^\top \mathbf{D} \zeta \zeta^\top \mathbf{U}] \\ &= \mathbf{U}^\top \mathbb{E}_\zeta \left[ \sum_{i=1}^d b_i \zeta_i^2 \cdot \zeta \zeta^\top \right] \mathbf{U} \\ &\stackrel{b}{=} \mathbf{U}^\top \left( \sum_{i=1}^d b_i \cdot \mathbf{I} + 2\mathbf{D} \right) \mathbf{U} \\ &\stackrel{c}{=} \text{tr}(\mathbf{A}) \cdot \mathbf{I} + 2\mathbf{A} \\ &\preceq 3\text{tr}(\mathbf{A}) \cdot \mathbf{I}. \end{aligned} \quad (26)$$

In  $\stackrel{a}{=}$ , we use  $\zeta \sim N(0, \mathbf{I}_d)$  based on the rotational invariance of the standard Gaussian distribution. In  $\stackrel{b}{=}$ , we use the second and fourth moment of standard Gaussian variables:  $\mathbb{E}\zeta_i^2 = 1$  and  $\mathbb{E}\zeta_i^4 = 3$ . In  $\stackrel{c}{=}$ , we use  $\text{tr}(\mathbf{U}^\top \mathbf{D} \mathbf{U}) = \text{tr}(\mathbf{U}^\top \mathbf{U} \mathbf{D}) = \text{tr}(\mathbf{D})$ . The last inequality of (26) is due to  $\text{tr}(\mathbf{A}) \cdot \mathbf{I} \succeq \mathbf{A}$ . Combining (26) and (25), we have

$$\mathbb{E}_{\xi_1, \dots, \xi_m} \|\tilde{\mathbf{a}} - \mathbf{a}\|_{\mathbf{A}}^2 \leq \frac{3\text{tr}(\mathbf{A})}{m} \|\mathbf{a}\|^2 - \frac{1}{m} \|\mathbf{a}\|_{\mathbf{A}}^2. \quad (27)$$

□

## G DEFERRED PROOFS IN SECTION 4

*Proof of Theorem 4.2.* We write the second-order Taylor expansion of  $f(\mathbf{x}^{k+1})$  at  $\mathbf{x}^k$ :

$$f(\mathbf{x}^{k+1}) \leq f(\mathbf{x}^k) + \langle \nabla f(\mathbf{x}^k), \mathbf{x}^{k+1} - \mathbf{x}^k \rangle + \frac{1}{2} \langle \mathbf{A}(\mathbf{x}^{k+1} - \mathbf{x}^k), \mathbf{x}^{k+1} - \mathbf{x}^k \rangle. \quad (28)$$

Combining the updating process of  $\mathbf{x}^{k+1}$  and (28), we have

$$f(\mathbf{x}^{k+1}) \leq f(\mathbf{x}^k) - h_k \langle \nabla f(\mathbf{x}^k), \tilde{\nabla}_m f(\mathbf{x}^k) \rangle + \frac{h_k^2}{2} \|\tilde{\nabla}_m f(\mathbf{x}^k)\|_{\mathbf{A}}^2. \quad (29)$$

Taking expectation with respect to  $\tilde{\nabla}_m f(\mathbf{x}^k)$  to both sides of (29), using Lemma 3.1, Lemma 3.2 and Definition 4.1, we have

$$\begin{aligned} \mathbb{E} f(\mathbf{x}^{k+1}) &\leq f(\mathbf{x}^k) - h_k \|\nabla f(\mathbf{x}^k)\|^2 + h_k^2 \left( \frac{3\text{tr}(\nabla^2 f(\mathbf{x}^k))}{2m} \|\nabla f(\mathbf{x}^k)\|^2 + \|\nabla f(\mathbf{x}^k)\|_{\mathbf{A}}^2 \right) \\ &\leq f(\mathbf{x}^k) - \left( h_k - h_k^2 \left( \frac{3\text{tr}(\mathbf{A})}{2m} + L \right) \right) \|\nabla f(\mathbf{x}^k)\|^2. \\ &\stackrel{a}{\leq} f(\mathbf{x}^k) - \left( h_k - h_k^2 \cdot \frac{5\text{tr}(\mathbf{A})}{2m} \right) \|\nabla f(\mathbf{x}^k)\|^2, \end{aligned} \quad (30)$$

where in  $\stackrel{a}{\leq}$  we use  $m \leq \frac{\text{tr}(\mathbf{A})}{L}$ . Then, using  $\mu$ -strongly convex condition, we have

$$\begin{aligned} f^* &\geq \min_{\mathbf{y}} \left\{ f(\mathbf{x}^k) + \langle \nabla f(\mathbf{x}^k), \mathbf{y} - \mathbf{x}^k \rangle + \frac{\mu}{2} \|\mathbf{y} - \mathbf{x}^k\|^2 \right\} \\ &= f(\mathbf{x}^k) - \frac{1}{2\mu} \|\nabla f(\mathbf{x}^k)\|^2. \end{aligned} \quad (31)$$

Combining (30) and (31), we have

$$\begin{aligned}\mathbb{E}f(x^{k+1}) - f^* &\leq f(\mathbf{x}^k) - f^* - 2\mu \left( h_k - \frac{5h_k^2 \text{tr}(\mathbf{A})}{2m} \right) (f(\mathbf{x}^k) - f^*) \\ &\stackrel{a}{=} \left( 1 - \frac{3m\mu}{16\text{tr}(\mathbf{A})} \right) (f(\mathbf{x}^k) - f^*),\end{aligned}\quad (32)$$

where in  $\stackrel{a}{=}$  we use  $h_k = \frac{m}{4\text{tr}(\mathbf{A})}$ . Thus, we finish the proof of Theorem 4.2.  $\square$

## H DEFERRED PROOFS IN SECTION 5

In this section, we prove Theorem 5.2 as below.

**Theorem 5.2.** *Assume that  $f(\mathbf{x})$  is  $L$ -smooth and has  $H$ -Lipschitz continuous Hessian matrix. With the assumption of  $\text{tr}(\nabla^2 f(\mathbf{x})) \leq r_1$  for any  $\mathbf{x} \in \mathbb{R}^d$  and  $f(\mathbf{x}^0) - f^* \leq \Delta$ . Then, under the hyper-parameter setting in Algorithm 4, the following result in expectation*

$$\mathbb{E}f(\mathbf{x}^k) \leq f(\mathbf{x}^0) - \sum_{i=1}^k \mathbb{E} \left[ \frac{h_i}{2} \|\nabla f(\mathbf{x}^i)\|^2 \right] \quad (33)$$

holds for option II, and holds with probability  $1 - \delta$  for option I.

*Proof of Theorem 5.2.* We write the third-order Taylor expansion of  $f(\tilde{\mathbf{x}}^{k+1})$  at  $\mathbf{x}^k$ :

$$\begin{aligned}f(\tilde{\mathbf{x}}^{k+1}) &\leq f(\mathbf{x}^k) + \langle \nabla f(\mathbf{x}^k), \tilde{\mathbf{x}}^{k+1} - \mathbf{x}^k \rangle + \frac{1}{2} \langle \nabla^2 f(\mathbf{x}^k) (\tilde{\mathbf{x}}^{k+1} - \mathbf{x}^k), \tilde{\mathbf{x}}^{k+1} - \mathbf{x}^k \rangle \\ &\quad + \frac{H}{6} \|\tilde{\mathbf{x}}^{k+1} - \mathbf{x}^k\|^3.\end{aligned}\quad (34)$$

Combining the updating process of  $\tilde{\mathbf{x}}^{k+1}$  with (34), we have

$$f(\tilde{\mathbf{x}}^{k+1}) \leq f(\mathbf{x}^k) - h_k \langle \nabla f(\mathbf{x}^k), \tilde{\nabla}_m f(\mathbf{x}^k) \rangle + \frac{h_k^2}{2} \|\tilde{\nabla}_m f(\mathbf{x}^k)\|_{\nabla^2 f(\mathbf{x}^k)}^2 + \frac{Hh_k^3}{6} \|\tilde{\nabla}_m f(\mathbf{x}^k)\|^3. \quad (35)$$

We denote  $\mathbb{E}_k[\cdot] = \mathbb{E}[\cdot | x_k]$ . Then taking expectation with respect to  $\tilde{\nabla}_m f(\mathbf{x}^k)$  to both sides of (35) and using Lemma 3.1 and Lemma 3.2, we have

$$\begin{aligned}\mathbb{E}_k f(\tilde{\mathbf{x}}^{k+1}) &\leq f(\mathbf{x}^k) - h_k \|\nabla f(\mathbf{x}^k)\|^2 + \frac{3h_k^2 \text{tr}(\nabla^2 f(\mathbf{x}^k))}{2m} \|\nabla f(\mathbf{x}^k)\|^2 + \frac{Hh_k^3}{6} \mathbb{E}_k \|\tilde{\nabla}_m f(\mathbf{x}^k)\|^3 \\ &\leq f(\mathbf{x}^k) - h_k \|\nabla f(\mathbf{x}^k)\|^2 + \frac{3h_k^2 r_1}{2m} \|\nabla f(\mathbf{x}^k)\|^2 + \frac{Hh_k^3}{6} \mathbb{E}_k \|\tilde{\nabla}_m f(\mathbf{x}^k)\|^3.\end{aligned}\quad (36)$$

Now we give an upper bound of  $\mathbb{E}_k \|\tilde{\nabla}_m f(\mathbf{x}^k)\|^3$ . We suppose the  $m$  random Gaussian vectors are  $\xi_i$  for  $i \in \{1, \dots, m\}$ . And we denote each  $\xi_i$  as

$$\xi_i = \begin{bmatrix} \xi_{i1} \\ \vdots \\ \xi_{id} \end{bmatrix}, \quad (37)$$

where  $\xi_{ij} \sim N(0, 1)$  is independent to each other. Then we have

$$\begin{aligned}
\mathbb{E}_k \|\tilde{\nabla}_m f(\mathbf{x}^k)\|^3 &\leq \left( \mathbb{E}_k \|\tilde{\nabla}_m f(\mathbf{x}^k)\|^6 \right)^{1/2} \\
&\stackrel{a}{\leq} \left( 64 \|\nabla f(\mathbf{x}^k)\|^6 + 64 \mathbb{E}_k \left\| \tilde{\nabla}_m f(\mathbf{x}^k) - \nabla f(\mathbf{x}^k) \right\|^6 \right)^{1/2} \\
&\stackrel{b}{=} 8 \|\nabla f(\mathbf{x}^k)\|^3 \cdot \left( 1 + \mathbb{E} \left( \left( \frac{1}{m} \sum_{i=1}^m (\zeta_{i1}^2 - 1) \right)^2 + \sum_{j=2}^d \left( \frac{1}{m} \sum_{i=1}^m \zeta_{i1} \zeta_{ij} \right)^2 \right)^3 \right)^{1/2} \\
&\stackrel{c}{\leq} 8 \|\nabla f(\mathbf{x}^k)\|^3 \left( 1 + 20000 \frac{d^3}{m^3} \right)^{1/2} \\
&\leq 1600 \frac{d^{3/2}}{m^{3/2}} \|\nabla f(\mathbf{x}^k)\|^3.
\end{aligned} \tag{38}$$

In  $\stackrel{a}{\leq}$ , we use the upper bound of the sixth moment as below.

$$\begin{aligned}
\mathbb{E} \|X\|^6 &\leq \mathbb{E} (\|X - \mathbb{E}X\| + \|\mathbb{E}X\|)^6 \\
&\leq \mathbb{E} (2 \max\{\|X - \mathbb{E}X\|, \|\mathbb{E}X\|\})^6 \\
&\leq 64 \mathbb{E} \|X - \mathbb{E}X\|^6 + 64 \|\mathbb{E}X\|^6.
\end{aligned} \tag{39}$$

In  $\stackrel{b}{=}$ , we analyse  $\left\| \tilde{\nabla}_m f(\mathbf{x}^k) - \nabla f(\mathbf{x}^k) \right\|^2$  as below. Considering the rotation invariance of the standard Gaussian vectors, we can simplify the computation by rotating the coordinate system. For simplicity, we denote  $\nabla f(\mathbf{x}^k) = \mathbf{a}$ . We can find an orthogonal matrix  $\mathbf{U}$  such that  $\mathbf{U}\mathbf{a} = [\|\nabla f(\mathbf{x}^k)\|, 0, \dots, 0]^\top$ . Letting  $\hat{\mathbf{a}} = \mathbf{U}\mathbf{a}$  and  $\zeta_i = \mathbf{U}\xi_i$ , we have  $\zeta_i \sim N(0, \mathbf{I}_d)$  and we denote  $\zeta_i$  as

$$\zeta_i = \begin{bmatrix} \zeta_{i1} \\ \vdots \\ \zeta_{id} \end{bmatrix}, \tag{40}$$

where  $\zeta_{ij} \sim N(0, 1)$  is also independent to each other. Then we have

$$\begin{aligned}
\left\| \tilde{\nabla}_m f(\mathbf{x}^k) - \nabla f(\mathbf{x}^k) \right\|^2 &= \left\| \mathbf{U} \left( \tilde{\nabla}_m f(\mathbf{x}^k) - \nabla f(\mathbf{x}^k) \right) \right\|^2 = \left\| \frac{1}{m} \sum_{i=1}^m (\mathbf{a}^\top \xi_i \mathbf{U} \xi_i - \mathbf{U}\mathbf{a}) \right\|^2 \\
&= \left\| \frac{1}{m} \sum_{i=1}^m ((\mathbf{U}\mathbf{a})^\top (\mathbf{U}\xi_i) \mathbf{U}\xi_i - \mathbf{U}\mathbf{a}) \right\|^2 \\
&= \left\| \frac{1}{m} \sum_{i=1}^m (\hat{\mathbf{a}}^\top \zeta_i \zeta_i - \hat{\mathbf{a}}) \right\|^2 \\
&= \|\nabla f(\mathbf{x}^k)\|^2 \left( \left( \frac{1}{m} \sum_{i=1}^m (\zeta_{i1}^2 - 1) \right)^2 + \sum_{j=2}^d \left( \frac{1}{m} \sum_{i=1}^m \zeta_{i1} \zeta_{ij} \right)^2 \right).
\end{aligned}$$

In  $\stackrel{c}{\leq}$ , we calculate the high-order moment of standard Gaussian distribution. Especially, we have  $\mathbb{E}\zeta_i^{2n} = O(1)$  and  $\mathbb{E}\zeta_i^{2n+1} = 0$ , where  $n \in \{1, 2, 3, 4, 5, 6\}$  ensuring that

$$\mathbb{E} \left( \left( \frac{1}{m} \sum_{i=1}^m (\zeta_{i1}^2 - 1) \right)^2 + \sum_{j=2}^d \left( \frac{1}{m} \sum_{i=1}^m \zeta_{i1} \zeta_{ij} \right)^2 \right)^3 = O\left(\frac{d^3}{m^3}\right). \tag{41}$$

Combining (38) with (36), we have

$$\mathbb{E}_k f(\tilde{\mathbf{x}}^{k+1}) \leq f(\mathbf{x}^k) - h_k \|\nabla f(\mathbf{x}^k)\|^2 + \frac{3h_k^2 r_1}{2m} \|\nabla f(\mathbf{x}^k)\|^2 + \frac{800Hh_k^3 d^{3/2}}{3m^{3/2}} \|\nabla f(\mathbf{x}^k)\|^3. \tag{42}$$

For option I, we define the event

$$\mathcal{H}_N = (p \geq 2\|\nabla f(\mathbf{x}^k)\|, \quad \forall k \leq N-1). \quad (43)$$

Let the event  $\tilde{\mathcal{H}}_k = (p \geq 2\|\nabla f(\mathbf{x}^k)\|)$ , with  $0 \leq k \leq N-1$ . Our choice of  $m$  ensures for all  $0 \leq k \leq N-1$ ,  $\tilde{\mathcal{H}}_k$  occurs with probability at least  $1 - \frac{\delta}{N}$ . So, we have

$$\mathbf{P}(\mathcal{H}_N) = \mathbf{P}\left(\bigcap_{k=0}^{N-1} \tilde{\mathcal{H}}_k\right) \geq 1 - \sum_{k=0}^{N-1} \mathbf{P}\left(\tilde{\mathcal{H}}_k^c\right) \geq 1 - \delta. \quad (44)$$

Therefore, with probability at least  $1 - \delta$ ,  $p \geq 2\|\nabla f(\mathbf{x}^k)\|$  holds for all  $k = 1, \dots, N-1$ . In the high-probability case, we have

$$\frac{3h_k^2 r_1}{2m} \|\nabla f(\mathbf{x}^k)\|^2 \leq \frac{1}{4} h_k \|\nabla f(\mathbf{x}^k)\|^2, \quad (45)$$

and

$$\frac{800Hh_k^3 d^{3/2}}{3m^{3/2}} \|\nabla f(\mathbf{x}^k)\|^3 \leq \frac{1}{4} h_k \|\nabla f(\mathbf{x}^k)\|^2. \quad (46)$$

For option II, By the choice of  $h_k$ , we also have

$$\frac{3h_k^2 r_1}{2m} \|\nabla f(\mathbf{x}^k)\|^2 \leq \frac{1}{4} h_k \|\nabla f(\mathbf{x}^k)\|^2, \quad (47)$$

and

$$\frac{800Hh_k^3 d^{3/2}}{3m^{3/2}} \|\nabla f(\mathbf{x}^k)\|^3 \leq \frac{1}{4} h_k \|\nabla f(\mathbf{x}^k)\|^2. \quad (48)$$

Therefore, by summing the (42) over  $k$  and taking the full expectation, we have

$$\mathbb{E}f(\mathbf{x}^k) \leq f(\mathbf{x}^0) - \sum_{i=1}^k \mathbb{E}\left[\frac{h_i}{2} \|\nabla f(\mathbf{x}^i)\|^2\right], \quad (49)$$

which holds with probability  $1 - \delta$  for option I and holds for option II. Now we take a deeper discussion.

- For Option I, In the high-probability case, in  $N$  iterations, there are at least  $N/2$  rounds of  $h_k = \frac{m}{16r_1(f)}$  or  $N/2$  rounds of  $H^{-1/2}p^{-1/2}d^{-3/4}m^{3/4}$ , and in every round  $\mathbb{E}f(\mathbf{x}^k)$  decreases by  $\mathbb{E}\left[\frac{h_k}{2}\|\nabla f(\mathbf{x}^k)\|^2\right]$ . Therefore, CORE-GD needs  $\mathcal{O}\left(\max\left\{\frac{\Delta r_1(f)}{m\epsilon^2}, \frac{\Delta H^{1/2}d^{3/4}}{m^{3/4}\epsilon^{3/2}}\right\}\right)$  rounds to find an  $\epsilon$ -stationary point from  $\{\mathbf{x}^k\}_{k=0}^{N-1}$  with probability  $1 - \delta$ . The total communication costs of CORE-GD are  $\mathcal{O}\left(\max\left\{\frac{\Delta r_1(f)}{\epsilon^2}, \frac{\Delta H^{1/2}d^{3/4}m^{1/4}}{\epsilon^{3/2}}\right\}\right)$ .
- For Option II, in  $N$  iterations, there are at least  $N/2$  rounds of  $h_k = \frac{m}{16r_1(f)}$  or  $N/2$  rounds of  $H^{-1/2}(L\Delta)^{-1/4}d^{-3/4}m^{3/4}$ , and in every round  $\mathbb{E}f(\mathbf{x}^k)$  decreases by  $\mathbb{E}\left[\frac{h_k}{2}\|\nabla f(\mathbf{x}^k)\|^2\right]$ . Therefore, CORE-GD needs  $\mathcal{O}\left(\max\left\{\frac{\Delta r_1(f)}{m\epsilon^2}, \frac{\Delta^{5/4}L^{1/4}H^{1/2}d^{3/4}}{m^{3/4}\epsilon^2}\right\}\right)$  rounds to find an  $\epsilon$ -stationary point from  $\{\mathbf{x}^k\}_{k=0}^{N-1}$  in high probability. The total communication costs of CORE-GD are  $\mathcal{O}\left(\max\left\{\frac{\Delta r_1(f)}{\epsilon^2}, \frac{\Delta^{5/4}L^{1/4}H^{1/2}d^{3/4}m^{1/4}}{\epsilon^2}\right\}\right)$ .

□

## I DEFERRED PROOFS IN APPENDIX B

*Proof of Theorem B.1.* Before our proof, we propose a useful Lemma taken from Jin et al. (2017).

**Lemma 5.1.** *Let the  $2 \times 2$  matrix  $\mathbf{A}$  have following form, for arbitrary  $a, b \in \mathbb{R}$ ,*

$$\mathbf{A} = \begin{bmatrix} a & b \\ 1 & 0 \end{bmatrix}. \quad (50)$$

Letting  $\mu_1, \mu_2$  denote the two eigenvalues of  $\mathbf{A}$ , then, for any  $t \in \mathbb{N}$ ,

$$\begin{aligned} [1 \ 0] \mathbf{A}^t &= \left( \sum_{i=0}^t \mu_1^i \mu_2^{t-i} \quad - \mu_1 \mu_2 \sum_{i=0}^{t-1} \mu_1^i \mu_2^{t-i-1} \right), \\ [0 \ 1] \mathbf{A}^t &= [1 \ 0] \mathbf{A}^{t-1}. \end{aligned} \quad (51)$$

Now we start our proof. Let  $\mathbf{z}^{k+1} = \begin{bmatrix} \mathbf{x}^{k+1} \\ \mathbf{x}^k \end{bmatrix}$ . The iterations of CORE-AGD can be written as

$$\mathbf{z}^{k+1} = \begin{bmatrix} (2-\beta)(\mathbf{I}-h\mathbf{A}) & -(1-\beta)(\mathbf{I}-h\mathbf{A}) \\ \mathbf{I} & \mathbf{0} \end{bmatrix} \mathbf{z}^k + h\boldsymbol{\epsilon}^k \triangleq \mathbf{B}\mathbf{z}^k + h\boldsymbol{\epsilon}^k, \quad (52)$$

where  $\boldsymbol{\epsilon}^k = \begin{bmatrix} (\mathbf{I} - \frac{1}{m} \sum_{i=1}^m \boldsymbol{\xi}_i \boldsymbol{\xi}_i^\top) \mathbf{A} \mathbf{y}_k \\ \mathbf{0} \end{bmatrix}$ , representing the error of estimating  $\nabla f(\mathbf{x}_k)$  with  $\tilde{\nabla}_m f(\mathbf{x}_k)$ .

By induction on  $k$ , we have

$$\mathbf{z}^N = \mathbf{B}^N \mathbf{z}^0 + h \sum_{k=0}^{N-1} \mathbf{B}^{N-k-1} \boldsymbol{\epsilon}^k. \quad (53)$$

Without loss of generality, we assume that  $\mathbf{x}^* = \mathbf{0}$ . We estimate the distance to the optimal solution by the  $\mathbf{A}^2$  norm of  $\mathbf{x}^k$ . To compute  $\|\mathbf{x}^k\|_{\mathbf{A}^2}$ , we decompose  $\mathbf{x}^k$  into eigen-directions of  $\mathbf{A}$ , and  $\mathbf{B}$  can be decomposed into  $2 \times 2$  matrices. For an eigen-direction with eigenvalue  $\lambda$ , the update of AGD can be written as follows:

$$\begin{aligned} \begin{bmatrix} x_{k+1} \\ x_k \end{bmatrix} &= \begin{bmatrix} (2-\beta)(1-h\lambda) & -(1-\beta)(1-h\lambda) \\ 1 & 0 \end{bmatrix} \begin{bmatrix} x_k \\ x_{k-1} \end{bmatrix} + h \begin{bmatrix} \epsilon \\ 0 \end{bmatrix} \\ &\triangleq \mathbf{B}_\lambda \begin{bmatrix} x_k \\ x_{k-1} \end{bmatrix} + h \begin{bmatrix} \epsilon \\ 0 \end{bmatrix}. \end{aligned} \quad (54)$$

Let  $\mu_1$  and  $\mu_2$  be the eigenvalues of  $\mathbf{B}_\lambda$ . Let  $\mathbf{C} = \begin{bmatrix} \mathbf{A}^2 & \mathbf{0} \\ \mathbf{0} & \mathbf{A}^2 \end{bmatrix}$ . By (53), We have

$$\mathbb{E} \|\mathbf{z}^N\|_{\mathbf{C}}^2 \leq 2 \|\mathbf{B}^N \mathbf{z}^0\|_{\mathbf{C}}^2 + 2 \mathbb{E} \left\| \sum_{k=0}^{N-1} \mathbf{B}^{N-k-1} \boldsymbol{\epsilon}^k \right\|_{\mathbf{C}}^2. \quad (55)$$



For the  $\epsilon^k$  terms, we have

$$\begin{aligned}
& \mathbb{E} \left\| \sum_{k=0}^{N-1} \mathbf{B}^{N-k-1} \epsilon^k \right\|_{\mathbf{C}}^2 \\
&= \sum_{k=0}^{N-1} \mathbb{E}_{\xi} \left\| \mathbf{B}^{N-k-1} \epsilon^k \right\|_{\mathbf{C}}^2 \\
&= \sum_{k=0}^{N-1} \mathbb{E}_{\xi} \left[ \mathbf{y}^k \top \mathbf{A} \top \left( \mathbf{I} - \frac{1}{m} \sum_{j=1}^m \xi_j \xi_j \top \right) \mathbf{0} \right] (\mathbf{B}^{N-k-1}) \top \mathbf{C} \mathbf{B}^{N-k-1} \left[ \left( \mathbf{I} - \frac{1}{m} \sum_{j=1}^m \xi_j \xi_j \top \right) \mathbf{A} \mathbf{y}^k \right] \\
&\stackrel{\text{Lemma 3.2}}{\leq} 3 \sum_{k=0}^{N-1} \text{tr} \left( (\mathbf{B}^{N-k-1}) \top \mathbf{C} \mathbf{B}^{N-k-1} \right) \cdot \frac{\|\mathbf{y}^k\|_{\mathbf{A}^2}^2}{m}.
\end{aligned} \tag{56}$$

In order to estimate  $\text{tr} \left( (\mathbf{B}^{N-k-1}) \top \mathbf{C} \mathbf{B}^{N-k-1} \right)$ , we consider blocks of  $\mathbf{B}$  with respect to eigen-directions of  $\mathbf{A}$ . The contribution of an eigen-direction with eigenvalue  $\lambda$  in the trace is

$$\begin{aligned}
& \text{tr} \left( (\mathbf{B}_{\lambda}^{N-k-1}) \top \cdot \begin{bmatrix} \lambda^2 & 0 \\ 0 & \lambda^2 \end{bmatrix} \mathbf{B}_{\lambda}^{N-k-1} \right) \\
&= \lambda^2 \left( \|[1 \ 0] \mathbf{B}_{\lambda}^{N-k-1}\|^2 + \|[0 \ 1] \mathbf{B}_{\lambda}^{N-k-1}\|^2 \right)
\end{aligned} \tag{57}$$

By Lemma 5.1, the last line in (57) equals to

$$\begin{aligned}
& \lambda^2 \left\| \left[ \sum_{i=0}^{N-k-1} \mu_{\lambda,1}^i \mu_{\lambda,2}^{N-k-1-i} \quad -\mu_{\lambda,1} \mu_{\lambda,2} \sum_{i=0}^{N-k-2} \mu_{\lambda,1}^i \mu_{\lambda,2}^{N-k-2-i} \right] \right\|^2 \\
&+ \lambda^2 \left\| \left[ \sum_{i=0}^{N-k-2} \mu_{\lambda,1}^i \mu_{\lambda,2}^{N-k-2-i} \quad -\mu_{\lambda,1} \mu_{\lambda,2} \sum_{i=0}^{N-k-3} \mu_{\lambda,1}^i \mu_{\lambda,2}^{N-k-3-i} \right] \right\|^2.
\end{aligned} \tag{58}$$

Define  $a_{\lambda} = |\mu_{\lambda,1}| = \sqrt{(1-\beta)(1-h\lambda)}$ . By the choice of  $\beta$ , we have  $a_{\lambda} \leq 1 - \frac{\sqrt{h\mu}}{2}$ . We have the following equation:

$$\lambda^2 \left\| \left[ \sum_{i=0}^{N-k} \mu_{\lambda,1}^i \mu_{\lambda,2}^{N-k-i} \quad -\mu_{\lambda,1} \mu_{\lambda,2} \sum_{i=0}^{N-k-1} \mu_{\lambda,1}^i \mu_{\lambda,2}^{N-k-1-i} \right] \right\|^2 \leq 4\lambda^2 (N-k)^2 a_{\lambda}^{N-k}. \tag{59}$$

From the definition of  $\mathbf{y}^k$  and Cauchy-Schwartz inequality, we have

$$\|\mathbf{y}^k\|_{\mathbf{A}^2}^2 \leq 8\|\mathbf{x}^k\|_{\mathbf{A}^2}^2 + 2\|\mathbf{x}^{k-1}\|_{\mathbf{A}^2}^2 \leq 8\|\mathbf{z}^k\|_{\mathbf{C}}^2 + 2\|\mathbf{z}^{k-1}\|_{\mathbf{C}}^2. \tag{60}$$

Therefore,

$$\begin{aligned}
& \mathbb{E} \left\| \sum_{k=0}^{N-1} \mathbf{B}^{N-k-1} \epsilon^k \right\|_{\mathbf{C}}^2 \\
&\leq 3 \sum_{k=0}^{N-1} \sum_{i=1}^d 8\lambda_i^2 (N-k)^2 a_{\lambda_i}^{N-k} \cdot \frac{\|\mathbf{y}^k\|_{\mathbf{A}^2}^2}{m} \\
&= 24 \sum_{i=1}^d \sum_{k=0}^{N-1} \lambda_i^2 (N-k)^2 a_{\lambda_i}^{N-k} \cdot \frac{\|\mathbf{y}^k\|_{\mathbf{A}^2}^2}{m}
\end{aligned} \tag{61}$$

Then we calculate  $\|\mathbf{B}^N \mathbf{z}^0\|_{\mathbf{C}}^2$ . As  $\mathbf{x}_{-1} = \mathbf{x}_0$ , the contribution of an eigen-directions of  $\mathbf{A}$  to the norm is

$$\lambda^2 x_{\lambda}^2 \left\| \mathbf{B}_{\lambda}^N \begin{bmatrix} 1 \\ 1 \end{bmatrix} \right\|^2, \tag{62}$$

where  $\lambda$  is the eigenvalue, and  $x_\lambda$  is the coefficient of the eigen-decomposition of  $\mathbf{x}_0$ . By Lemma 5.1, we have

$$\begin{aligned} \mathbf{B}_\lambda^N \begin{bmatrix} 1 \\ 1 \end{bmatrix} &= \begin{bmatrix} \sum_{i=0}^N \mu_{\lambda,1}^i \mu_{\lambda,2}^{N-i} - \mu_{\lambda,1} \mu_{\lambda,2} \sum_{i=0}^{N-1} \mu_{\lambda,1}^i \mu_{\lambda,2}^{N-1-i} \\ \sum_{i=0}^{N-1} \mu_{\lambda,1}^i \mu_{\lambda,2}^{N-1-i} - \mu_{\lambda,1} \mu_{\lambda,2} \sum_{i=0}^{N-2} \mu_{\lambda,1}^i \mu_{\lambda,2}^{N-2-i} \end{bmatrix} \\ &= \frac{1}{2} \begin{bmatrix} \mu_{\lambda,1}^N + \mu_{\lambda,2}^N + (2 - \mu_{\lambda,1} - \mu_{\lambda,2}) \sum_{i=0}^N \mu_{\lambda,1}^i \mu_{\lambda,2}^{N-i} \\ \mu_{\lambda,1}^{N-1} + \mu_{\lambda,2}^{N-1} + (2 - \mu_{\lambda,1} - \mu_{\lambda,2}) \sum_{i=0}^{N-1} \mu_{\lambda,1}^i \mu_{\lambda,2}^{N-1-i} \end{bmatrix} \\ &= \frac{1}{2} \begin{bmatrix} \mu_{\lambda,1}^N + \mu_{\lambda,2}^N + (2 - \mu_{\lambda,1} - \mu_{\lambda,2}) \frac{\mu_{\lambda,1}^{N+1} - \mu_{\lambda,2}^{N+1}}{\mu_{\lambda,1} - \mu_{\lambda,2}} \\ \mu_{\lambda,1}^{N-1} + \mu_{\lambda,2}^{N-1} + (2 - \mu_{\lambda,1} - \mu_{\lambda,2}) \frac{\mu_{\lambda,1}^N - \mu_{\lambda,2}^N}{\mu_{\lambda,1} - \mu_{\lambda,2}} \end{bmatrix} \end{aligned} \quad (63)$$

The  $\frac{2 - \mu_{\lambda,1} - \mu_{\lambda,2}}{\mu_{\lambda,1} - \mu_{\lambda,2}}$  term in (63) can be bounded as follows:

$$\begin{aligned} \frac{2 - \mu_{\lambda,1} - \mu_{\lambda,2}}{\mu_{\lambda,1} - \mu_{\lambda,2}} &= \frac{2 - (2 - \beta)(1 - h\lambda)}{\sqrt{(1 - h\lambda)(h\lambda(2 - \beta)^2 - \beta^2)}} \\ &\leq \frac{\beta + h\lambda}{\sqrt{\frac{1}{4} \cdot h\lambda}} \\ &\leq 2 + \sqrt{h\lambda} \\ &\leq 3. \end{aligned} \quad (64)$$

Therefore,

$$\begin{aligned} \left\| \mathbf{B}_\lambda^N \begin{bmatrix} 1 \\ 1 \end{bmatrix} \right\|^2 &\leq \left( |\mu_{\lambda,1}^{2N}| + |\mu_{\lambda,2}^{2N}| + 9|\mu_{\lambda,1}^{2N+2}| + 9|\mu_{\lambda,2}^{2N+2}| + |\mu_{\lambda,1}^{2N-2}| + |\mu_{\lambda,2}^{2N-2}| + 9|\mu_{\lambda,1}^{2N}| + 9|\mu_{\lambda,2}^{2N}| \right) \\ &\leq 40 \left( 1 - \frac{\sqrt{h\mu}}{2} \right)^{2N-2}, \end{aligned} \quad (65)$$

and we have

$$\|\mathbf{B}^N \mathbf{z}^0\|_{\mathbf{C}}^2 \leq 40 \left( 1 - \frac{\sqrt{h\mu}}{2} \right)^{2N-2} \|\mathbf{z}^0\|_{\mathbf{C}}^2. \quad (66)$$

Finally, we use induction to prove that  $\mathbb{E}\|\mathbf{z}^N\|_{\mathbf{C}}^2 < 200(1 - b)^N \|\mathbf{z}^0\|_{\mathbf{C}}^2$  where  $b = 1 - \frac{\sqrt{h\mu}}{4}$ . Suppose that for  $k < N$ , we have  $\mathbb{E}\|\mathbf{z}^k\|_{\mathbf{C}}^2 < 200(1 - b)^N \|\mathbf{z}^0\|_{\mathbf{C}}^2$ . By (55), we have

$$\mathbb{E}\|\mathbf{z}^0\|_{\mathbf{C}}^2 \leq 80 \left( 1 - \frac{\sqrt{h\mu}}{2} \right)^{2N-2} \|\mathbf{z}^N\|_{\mathbf{C}}^2 + 48h^2 \sum_{i=1}^d \sum_{k=0}^{N-1} \lambda_i^2 (N - k)^2 a_{\lambda_i}^{N-k} \cdot \frac{\|\mathbf{y}^k\|_{\mathbf{A}^2}^2}{m}. \quad (67)$$

By the definition of  $\mathbf{y}^k$  and the assumption for induction, we have

$$\mathbb{E}\|\mathbf{y}^k\|_{\mathbf{A}^2}^2 \leq 2000(1 - b)^{N-1} \|\mathbf{z}^0\|_{\mathbf{C}}^2. \quad (68)$$

Using the summation result:

$$\sum_{k=1}^n k^2 a^k < \frac{1}{(1 - a)^3}, \quad (69)$$

we have

$$\begin{aligned} \mathbb{E}\|\mathbf{z}^N\|_{\mathbf{C}}^2 &\leq 80 \left( 1 - \frac{\sqrt{h\mu}}{2} \right)^{2N-2} \|\mathbf{z}^0\|_{\mathbf{C}}^2 + 96000(1 - b)^{N-1} \sum_{i=1}^d \frac{h^2 \lambda_i^2}{\left( 1 - \frac{a_{\lambda_i}}{b} \right)^3} \frac{\|\mathbf{z}^0\|_{\mathbf{C}}^2}{m} \\ &\leq 80 \left( 1 - \frac{\sqrt{h\mu}}{2} \right)^{2N-2} \|\mathbf{z}^0\|_{\mathbf{C}}^2 + 384000(1 - b)^{N-1} \sum_{i=1}^d \sqrt{h\lambda_i} \frac{\|\mathbf{z}^0\|_{\mathbf{C}}^2}{m}. \end{aligned} \quad (70)$$

By  $h = \frac{m^2}{14400^2(\sum_i \lambda_i^{1/2})^2}$ , we have

$$\mathbb{E}\|\mathbf{z}^N\|_{\mathbb{C}}^2 \leq 80 \left(1 - \frac{\sqrt{h\mu}}{2}\right)^{N-1} \|\mathbf{z}^0\|_{\mathbb{C}}^2 + 40(1-b)^{N-1} \|\mathbf{z}^0\|_{\mathbb{C}}^2. \quad (71)$$

Therefore, by  $h\mu \leq 14400^{-2}$  and induction, we have  $\mathbb{E}\|\mathbf{z}^N\|_{\mathbb{C}}^2 < 200(1-b)^N \|\mathbf{z}^0\|_{\mathbb{C}}^2$  holds for positive integers  $N$ .

Finally, we have

$$\begin{aligned} \|\mathbf{z}^N\|_{\mathbb{C}}^2 &= (\mathbf{x}^N)^\top \mathbf{A}^2 \mathbf{x}^N + (\mathbf{x}^{N-1})^\top \mathbf{A}^2 \mathbf{x}^{N-1} \\ &\geq \mu \left( (\mathbf{x}^N)^\top \mathbf{A} \mathbf{x}^N + (\mathbf{x}^{N-1})^\top \mathbf{A} \mathbf{x}^{N-1} \right) \\ &= 2\mu \left( f(\mathbf{x}^N) + f(\mathbf{x}^{N-1}) \right), \end{aligned} \quad (72)$$

and

$$\begin{aligned} \|\mathbf{z}^0\|_{\mathbb{C}}^2 &= 2(\mathbf{x}^0)^\top \mathbf{A}^2 \mathbf{x}^0 \\ &\leq 2L(\mathbf{x}^0)^\top \mathbf{A} \mathbf{x}^0 \\ &= 4Lf(\mathbf{x}^0). \end{aligned} \quad (73)$$

Therefore,

$$\begin{aligned} \mathbb{E}f(\mathbf{x}^N) &\leq \frac{1}{2\mu} \cdot 200(1-b)^N \cdot 4Lf(\mathbf{x}^0) \\ &= 400 \cdot \frac{L}{\mu} \cdot \left(1 - \frac{m\mu}{57600 \sum_i \lambda_i^{1/2}}\right)^N \cdot f(\mathbf{x}^0). \end{aligned} \quad (74)$$

Thus, we finish our proof of Theorem B.1.  $\square$

## J DIFFERENTIAL PRIVACY

### J.1 INTRODUCTION OF DIFFERENTIAL PRIVACY

In distributed machine learning, privacy has attracted increasing attention. In general, people tend to think about whether the machines will reveal information to attackers. However, in this section we study that when information transmitted (for example,  $p_{ij}$  in Algorithm 2) is leaked, attackers still has no access to the actual gradient information. Moreover, the privacy argument proposed by our paper is based on the differential privacy (Dwork, 2006). Usually, there is a trade-off between privacy and accuracy. Since random projection is a differential-private operation, our CORE-GD can naturally satisfy certain differential privacy conditions. Below, we introduce basic definitions and our main result in differential privacy.

First we introduce the definition of adjacent vectors and  $(\epsilon, \delta)$ -differential privacy as below.

**Definition 5.1.** For two vectors  $\mathbf{x}$  and  $\mathbf{y}$ , we say  $\mathbf{x}$  and  $\mathbf{y}$  are adjacent if they satisfy

$$\|\mathbf{x} - \mathbf{y}\| \leq \Delta_1 \|\mathbf{x}\|. \quad (75)$$

**Definition 5.2.** Given  $\epsilon, \delta \geq 0$ , letting the output of an algorithm  $M$  with input  $\mathbf{x}$  be  $M(\mathbf{x})$ , the algorithm  $M$  satisfies the  $(\epsilon, \delta)$ -differential privacy property if for an distinguishable set of outputs  $S$ , and each adjacent variances pairs  $\mathbf{x}$  and  $\mathbf{y}$ , it holds that

$$\mathcal{P}(M(\mathbf{x}) \in S) \leq \exp(\epsilon) \mathcal{P}(M(\mathbf{y}) \in S) + \delta. \quad (76)$$

Intuitively, the differential privacy of an algorithm ensures that if two data are adjacent, with a high probability, one cannot distinguish them from the outputs of the algorithm. We notice that in CORE-based algorithm, if two gradient vectors are not far from each other, then after a random projection, the results will be undistinguished with a high probability. So our algorithm naturally has a certain privacy guarantee. Specifically, we have the result below.

**Theorem 5.3.** *Under the assumptions and settings in Corollary 4.8, assume that  $\Delta_1 < 0.1$ . For any  $(\epsilon, \delta)$  satisfying  $\epsilon = 20\Delta_1 \ln \frac{1}{\delta}$ , Algorithm 2 with the released information  $p_{ij}$  satisfies  $(\epsilon, \delta)$ -differential privacy.*

Theorem 5.3 is based on the observation mentioned above. Surprisingly, Theorem 5.3 does not depend on the choice of  $m$ . We think this is because the random projection is rotational invariant, so the attacker can only learn about the norm of the gradient and have no idea about its direction.

## J.2 PROOF OF THEOREM 5.3

For the convenience of our proofs, we first present some properties of  $(\epsilon, \delta)$ -differential privacy.

**Definition 5.4.** *For two adjacent variances pairs  $\mathbf{x}$  and  $\mathbf{y}$ , an algorithm  $M$  and outputs  $o$ , the privacy loss is defined as*

$$\mathcal{L} = \ln \frac{\mathcal{P}(M(\mathbf{x}) = o)}{\mathcal{P}(M(\mathbf{y}) = o)}. \quad (77)$$

**Lemma 5.5.**  *$M$  satisfies  $(\epsilon, \delta)$ -differential privacy if  $\mathcal{P}(\mathcal{L} > \epsilon) \leq \delta$ .*

*Proof.* Letting  $B = \{o : \mathcal{L} > \epsilon\}$ , we have

$$\begin{aligned} \mathcal{P}(M(\mathbf{x}) \in S) &= \mathcal{P}(M(\mathbf{x}) \in S \cap B) + \mathcal{P}(M(\mathbf{x}) \in S - B) \\ &\stackrel{a}{\leq} \mathcal{P}(M(\mathbf{x}) \in B) + \mathcal{P}(M(\mathbf{x}) \in S - B) \\ &\stackrel{b}{\leq} \mathcal{P}(M(\mathbf{x}) \in B) + \exp(\epsilon)\mathcal{P}(M(\mathbf{y}) \in S - B) \\ &\stackrel{c}{\leq} \mathcal{P}(M(\mathbf{x}) \in B) + \exp(\epsilon)\mathcal{P}(M(\mathbf{y}) \in S) \\ &\stackrel{d}{\leq} \exp(\epsilon)\mathcal{P}(M(\mathbf{y}) \in S) + \delta. \end{aligned} \quad (78)$$

□

In  $\stackrel{a}{\leq}$  and  $\stackrel{c}{\leq}$ , we use the fact that  $\mathcal{P}(X \in A_1) \leq \mathcal{P}(X \in A_2)$  if  $A_1 \subseteq A_2$ . In  $\stackrel{b}{\leq}$ , we use Definition 5.4. In  $\stackrel{d}{\leq}$ , we use  $\mathcal{P}(\mathcal{L} > \epsilon) \leq \delta$ . And by a similar analysis of Lemma 5.5, we have

**Lemma 5.6.**  *$M$  satisfies  $(\epsilon, \delta)$ -differential privacy if  $\mathcal{P}(\mathcal{L} < -\epsilon) \leq \delta$ .*

Now we analyze the differential privacy of CORE compression. If we use CORE to compress an vector  $\mathbf{a}$ , we project it to  $m$  Gaussian vectors  $\xi_1, \dots, \xi_m$ , and send the inner products  $p_i = \langle \mathbf{a}, \xi_i \rangle$ . We define

$$\Xi = [\xi_1 \cdots \xi_m]^\top, \quad (79)$$

and

$$\mathbf{p} = [p_1 \cdots p_m]^\top \in \mathbb{R}^m. \quad (80)$$

Therefore, we have  $\mathbf{p} = \Xi \mathbf{a}$ . We define the compression as

$$\begin{aligned} C : \mathbb{R}^d &\rightarrow \mathbb{R}^m \\ \mathbf{a} &\mapsto \mathbf{p}. \end{aligned} \quad (81)$$

Now we study the distribution of  $C(\mathbf{a})$  for further analysis.

**Lemma 5.7.**  $C(\mathbf{a}) \sim N(\mathbf{0}, \|\mathbf{a}\|^2 \mathbf{I}_m)$ .

*Proof.* By the definition of  $C$  and the properties of standard Gaussian distribution,  $C(\mathbf{a})$  must follows an mean zero Gaussian distribution. We notice that the covariance of  $p_i$  and  $p_j$  is

$$\mathbb{E}p_i p_j = \mathbb{E} \mathbf{a}^\top \xi_i \xi_j^\top \mathbf{a} = \begin{cases} 0 & i \neq j, \\ \|\mathbf{a}\|^2 & i = j. \end{cases} \quad (82)$$

Therefore, the variance of  $C(\mathbf{a})$  is

$$\mathbb{E}C(\mathbf{a})C(\mathbf{a})^\top = \|\mathbf{a}\|^2 \mathbf{I}_m. \quad (83)$$

□

By Lemma 5.5, 5.6 and 5.7, we can start the proof of Theorem 5.3.

*Proof of Theorem 5.3.* To simplify the representation, let  $\sigma_1 = \|\nabla f(\mathbf{x}^k)\|_2$  and  $\sigma_2 = \|\nabla f'(\mathbf{x}^k)\|_2$ , where  $\nabla f(\mathbf{x}^k)$  and  $\nabla f'(\mathbf{x}^k)$  are adjacent. By Lemma 5.7, we have  $C(\nabla f(\mathbf{x}^k)) \sim N(0, \sigma_1^2 \mathbf{I}_m)$  and  $C(\nabla f'(\mathbf{x}^k)) \sim N(0, \sigma_2^2 \mathbf{I}_m)$ . Based on Definition 5.4, the privacy loss is

$$\begin{aligned} \mathcal{L} &= \ln \left( \frac{\sigma_2^m}{\sigma_1^m} \exp \left( \frac{\|\mathbf{p}\|^2}{2} \left( \frac{1}{\sigma_2^2} - \frac{1}{\sigma_1^2} \right) \right) \right) \\ &= \frac{\|\mathbf{p}\|^2}{2} \left( \frac{1}{\sigma_2^2} - \frac{1}{\sigma_1^2} \right) + m \ln \frac{\sigma_2}{\sigma_1}. \end{aligned} \quad (84)$$

If  $\sigma_1 > \sigma_2$  we compute the probability of event  $\{\mathcal{L} > \epsilon\}$ , which is equivalent to

$$\|\mathbf{p}\|^2 > \frac{2 \left( \epsilon - m \ln \frac{\sigma_2}{\sigma_1} \right)}{\frac{1}{\sigma_2^2} - \frac{1}{\sigma_1^2}}. \quad (85)$$

And if  $\sigma_1 < \sigma_2$  we compute the probability of event  $\{\mathcal{L} < -\epsilon\}$ , which is equivalent to

$$\|\mathbf{p}\|^2 > \frac{2 \left( \epsilon - m \ln \frac{\sigma_1}{\sigma_2} \right)}{\frac{1}{\sigma_1^2} - \frac{1}{\sigma_2^2}}. \quad (86)$$

We define

$$t = \frac{2\epsilon}{\left| \frac{1}{\sigma_2^2} - \frac{1}{\sigma_1^2} \right|}, \quad (87)$$

so in both cases, we have  $\mathcal{P}(\mathcal{L} > \epsilon) \leq \mathcal{P}(\|\mathbf{p}\|^2 > t)$  or  $\mathcal{P}(\mathcal{L} < -\epsilon) \leq \mathcal{P}(\|\mathbf{p}\|^2 > t)$ . Noticing that  $\|\mathbf{p}\|^2$  is the sum of square of independent identically Gaussian distribution, so we have

$$\|\mathbf{p}\|^2 \sim \sigma_1^2 \chi_m^2, \quad (88)$$

where  $\chi_m^2$  is chi-square distribution with the degree of freedom  $m$ . According to tail bound of chi-square distribution, we have

$$\mathcal{P}(\|\mathbf{p}\|^2 > t) \stackrel{a}{\leq} \exp \left( -\frac{t}{20\sigma_1^2} \right) \stackrel{b}{\leq} \delta. \quad (89)$$

In  $\stackrel{a}{\leq}$ , we use the tail bound of chi-square distribution. If  $X \sim \chi_n^2$ , then

$$\mathcal{P}(X > t \cdot 2n) \leq \exp \left( -\frac{t \cdot n}{10} \right). \quad (90)$$

In  $\stackrel{b}{\leq}$ , we use the definition of  $\epsilon$  that  $\epsilon = 20\Delta_1 \ln \frac{1}{\delta}$ . We have

$$\begin{aligned} t &= 40\Delta_1 \ln \frac{1}{\delta} \cdot \frac{\sigma_1^2 \sigma_2^2}{|\sigma_1^2 - \sigma_2^2|} \\ &= 40\Delta_1 \ln \frac{1}{\delta} \cdot \sigma_1^2 \cdot \frac{1}{|\sigma_1^2/\sigma_2^2 - 1|} \\ &\geq 40\Delta_1 \ln \frac{1}{\delta} \cdot \sigma_1^2 \cdot \frac{1}{2\Delta_1} \\ &= 20 \ln \frac{1}{\delta} \cdot \sigma_1^2. \end{aligned} \quad (91)$$

Therefore, we have proven that

$$\mathcal{P}(\mathcal{L} > \epsilon) \leq \mathcal{P}(\|\mathbf{p}\|^2 > t) \leq \delta, \quad \sigma_1 > \sigma_2, \quad (92)$$

and

$$\mathcal{P}(\mathcal{L} < -\epsilon) \leq \mathcal{P}(\|\mathbf{p}\|^2 > t) \leq \delta, \quad \sigma_1 < \sigma_2. \quad (93)$$

Based on Lemma 5.5 and 5.6, we obtain that our algorithm satisfies  $(\epsilon, \delta)$ -differential privacy. Thus we finish the proof of Theorem 5.3.  $\square$

## K EXPERIMENT DESCRIPTION AND DISCUSSIONS

We conduct experiments to test the CORE method. We train the ridge and logistic regressions on the two datasets: MNIST and covtype. Further, we also train the ResNet18 on the two datasets: CIFAR10 and CIFAR100 to test the effect of our method on neural networks. In this section, we only compare our method with some basic compression technique, for example, Gradient Quantization (Seide et al., 2014; Alistarh et al., 2017; Tang et al., 2021; Wen et al., 2017) and Gradient Sparsity (Aji & Heafield, 2017; Lin et al., 2017), to verify that our algorithm works. We also do not use other compensation techniques such as feedback. In the future, we will add more comparison and improvements to get better experimental results.

**Methods.** We have implemented the following three gradient compression methods to compare their convergence rate and communication complexities.

- Gradient Quantization (Seide et al., 2014; Alistarh et al., 2017; Tang et al., 2021; Wen et al., 2017) and . This method compresses each dimension of the gradient to several bits instead of a 32-bit floating-point number to transmit with some techniques of error feedback to reduce the quantization errors. This method can compress the gradient up to 32 times.
- Gradient Sparsity (Aji & Heafield, 2017; Lin et al., 2017). This method only preserves the dimensions that occupy more than a certain proportion of the norm in the gradient to transmit while accumulating other dimensions to the next step. In this step other dimensions are replaced by 0 to sparse the gradient. This method works better on the models with gradients having dominant components.
- CORE. Our method projects the gradient by common Gaussian random vectors in order to realize dimension reduction, which could compress the gradient by a certain multiple.

**Performance Plot.** We design two kinds of performance plots. One uses the number of "passes" of the dataset as the  $x$ -axis. Note this also reflects the number of communication round since in our experiments the batch-size for all algorithms are the same. Another uses the number of bits the model transmits as the  $x$ -axis. Both use the training objective distance to the minimum as the  $y$ -axis.

### K.1 LINEAR MODEL

We use the above three methods on the following two datasets downloaded from the LibSVM website (Chang, 2008):

- The MNIST dataset (784 features). One dataset about  $1 * 28 * 28$  pixel handwritten 0 – 9 pictures.
- The covtype dataset (54 features). One dataset about some features of a piece of land and the types of vegetation that grows on it.

We use distributed gradient descent and accelerated gradient descent to optimize the logistic regression and ridge regression on different datasets. Though we do not give convergence analysis for CORE-AGD on logistic regression, we find it works empirically. Considering experiments on a real distributed system typical set the number of machines up to 16 as Alistarh et al. (2017) but some simulation experiments often set the number of machines much bigger, for example 100 as Freund et al. (2022), we set the number of machines  $N = 50$  as a compromise. We take the algorithm without any gradient compression as the baseline and select learning rate from  $\{10^{-k} : k \in \mathbb{Z}\}$ . In most cases the learning rate is not necessary to be very small, but noticing that Gradient Quantization may cause relatively large error in the early stage of training, we set the learning rate of the algorithm using this method smaller to ensure convergence. We also compare the same algorithm with and without momentum.

To make comparison across datasets, we normalize every vector by its Euclidean norm to ensure the Euclidean norm of each vector is 1.

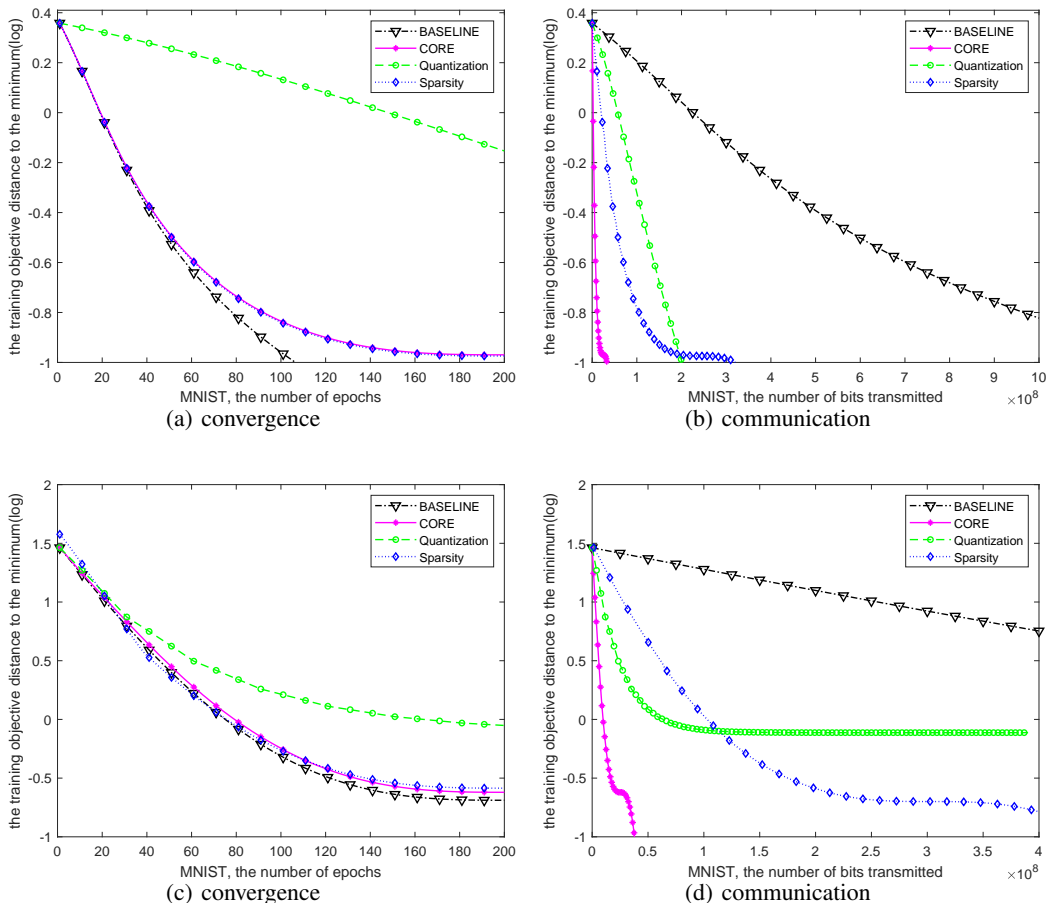

Figure 1: Experiments on MNIST. (a) and (c) plot the function value against the number of epochs respectively, and (b) and (d) plot the function value against communication costs respectively. (a) and (b) plot the result of logistic regression while (c) and (d) plot the result of ridge regression.

The results on linear models are shown in Figure 1 and 2. The results show that our method has lower communication costs while ensuring a nearly same convergence rate (communication round). We notice that the Gradient Quantization has a poor effect with linear models. And compared to the Gradient Sparsity, our method has a significant advantage on communication costs. Another result is that our method works better with momentum.

## K.2 NEURAL NETWORK

We use the above three methods on the following two datasets downloaded from <http://www.cs.toronto.edu/~kriz/cifar.html>:

- the CIFAR10 dataset (50000 samples). One dataset about  $3 * 32 * 32$  pixel pictures of 10 kinds of different classes.
- the CIFAR100 dataset (50000 samples). One dataset about  $3 * 32 * 32$  pixel pictures of 100 kinds of classes which can be placed into 20 superclasses.

Our goal is to compare our method with the baseline method, Gradient Quantization and Gradient Sparsity on the speed of convergence and communication costs. Moreover, we also compare CORE with some near results such as PowerSGD (Vogels et al., 2019) and DRIVE (Vargaftik et al., 2021). We choose common-used ResNet-18 (He et al., 2016) as the structure of network. We train the model with SGD, the setting of hyperparameters are shown in Table 2.

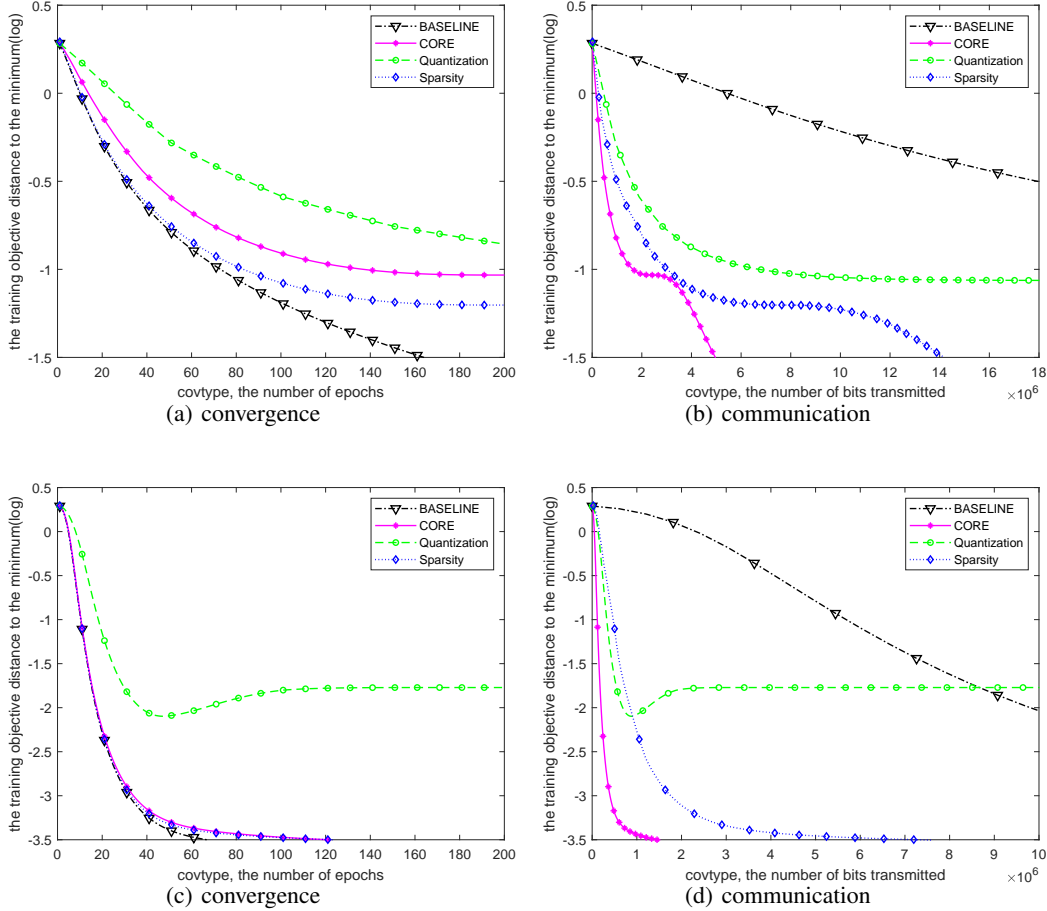

Figure 2: Experiments on covtype with logistic regression. (a) and (c) plot the function value against the number of epochs without and with momentum, respectively, and (b) and (d) plot the function value against communication costs without and with momentum, respectively.

The results on neural networks are shown in Figure 3. The result shows that our method has a greater convergence rate and communication costs compared to the Gradient Quantization and the Gradient Sparsity. The convergence rate of our method is basically the same as the baseline while the communication costs reduce by hundreds of times. To be more specific, the iteration convergence rate of our CORE method is almost the fastest in the methods participating in the comparison while the number of bits transmitted is much smaller than baseline and almost twice as small as PowerSGD and DRIVE.

## L ADDITIONS

### L.1 ADDITIONAL FIGURE

We show the eigenvalues of data matrix on MNIST and the eigenvalues of a three-layer neural network on MNIST in Figure 4.

### L.2 MORE MODELS WITH DIMENSION-FREE EFFECTIVE DIMENSION

We will show more learning models for which the effect dimension is dimension-free. As one typical example, we consider the two-layer neural network model under suitable conditions.

**Proposition 5.1.** *Define  $f(\mathbf{W}, \mathbf{w}) = \mathbf{w}^\top \sigma(\mathbf{W}^\top \mathbf{x})$ , where  $\sigma$  is the activation function. When  $\|\mathbf{x}\|_1 \leq r_1$ ,  $\|\mathbf{w}\| \leq r_2$  and  $\sigma''(x) \leq \alpha$ , we have  $\text{tr}(\nabla^2 f(\mathbf{W}, \mathbf{w})) \leq \alpha r_1 r_2$ .*



Table 2: Hyperparameter setting of the experiment on networks

| Hyperparameter               | CIFAR10        | CIFAR100       |
|------------------------------|----------------|----------------|
| Batch Size(for all machines) | 1024           | 512            |
| Batch Size(for each machine) | 32             | 16             |
| Machine Numbers              | 32             | 32             |
| Optimizer                    | SGD            | SGD            |
| Learning Rate                | 5e-2           | 5e-2           |
| Min Learning Rate            | 3e-6           | 3e-6           |
| Weight Decay                 | 5e-4           | 5e-4           |
| Epoch                        | 200            | 200            |
| Learning Rate Scheduler      | cosine decay   | cosine decay   |
| Input Resolution             | $32 \times 32$ | $32 \times 32$ |
| Momentum                     | 0.9            | 0.9            |
| Compression Ratio            | 100+           | 80+            |

*Proof.* By direct computation, we have

$$\begin{aligned}
\frac{\partial f}{\partial \mathbf{w}} &= \sigma(\mathbf{W}^\top \mathbf{x}), \\
\frac{\partial f}{\partial \mathbf{W}} &= (\sigma'(\mathbf{W}^\top \mathbf{x}) \odot \mathbf{w}) \otimes \mathbf{x}, \\
\frac{\partial^2 f}{\partial \mathbf{w}^2} &= \mathbf{0}, \\
\frac{\partial^2 f}{\partial \mathbf{W}^2} &= \text{Diag}(\sigma''(\mathbf{W}^\top \mathbf{x}) \odot \mathbf{w}) \otimes \mathbf{x} \otimes \mathbf{x}.
\end{aligned} \tag{94}$$

Therefore,

$$\begin{aligned}
\text{tr}(\nabla^2 f(\mathbf{W}, \mathbf{w})) &= \|\mathbf{x}\|^2 \cdot \text{tr}(\text{Diag}(\sigma''(\mathbf{W}^\top \mathbf{x}) \odot \mathbf{w})) \\
&\leq r_1^2 \cdot \langle \sigma''(\mathbf{W}^\top \mathbf{x}), \mathbf{x} \rangle \\
&\leq \alpha r_1 r_2.
\end{aligned} \tag{95}$$

□

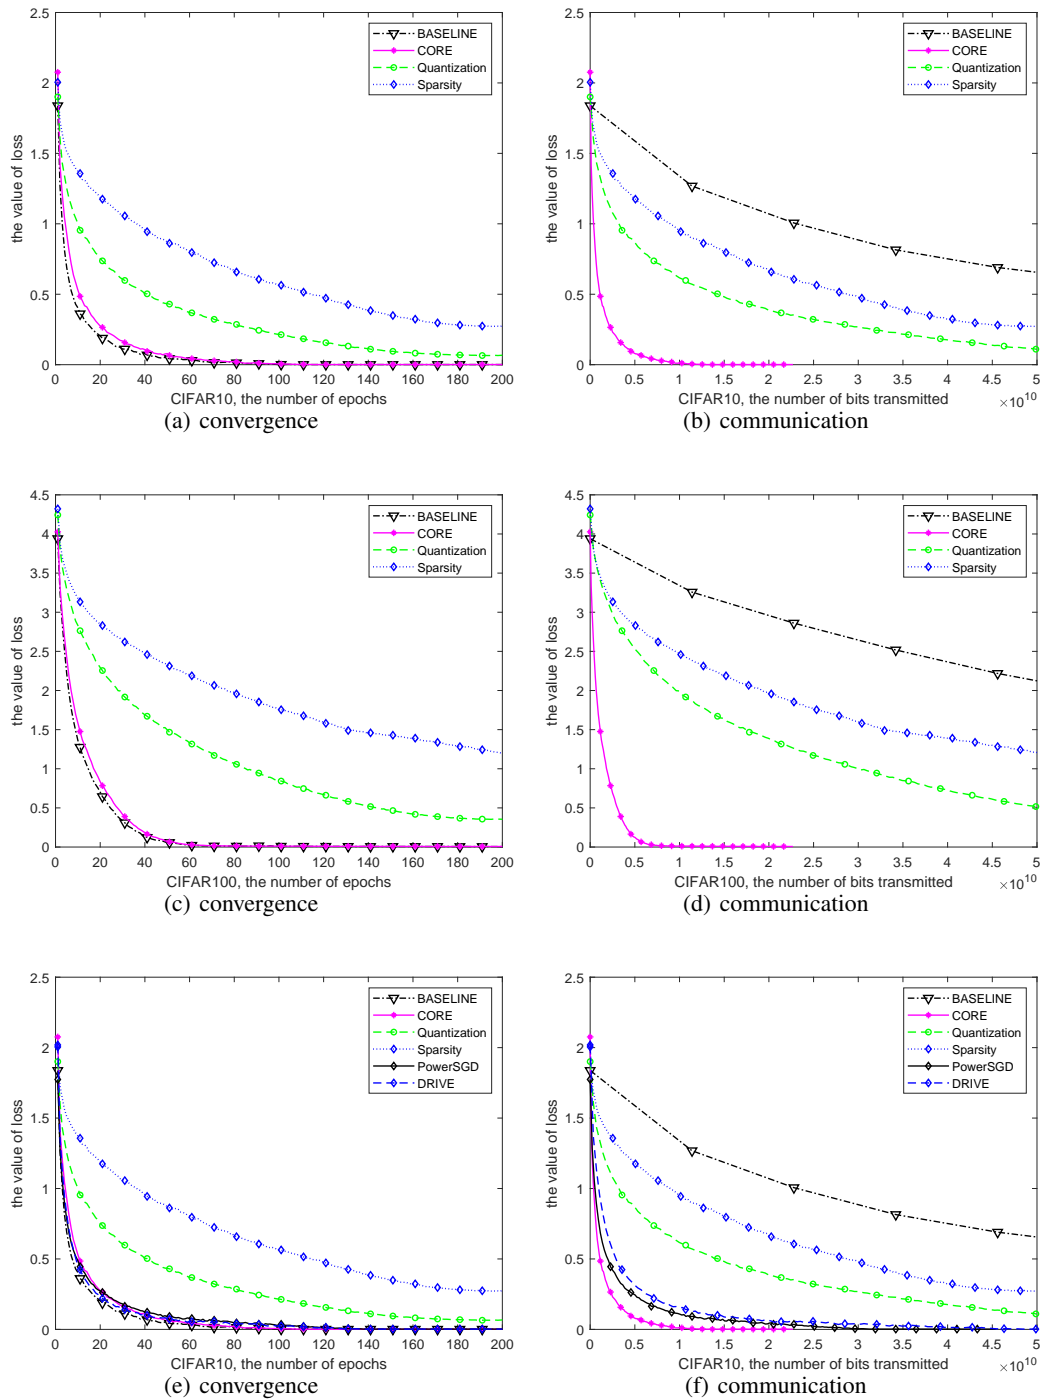

Figure 3: Experiments on the neural network. (a) and (c) plot the function value against the number of epochs on CIFAR10 and CIFAR100, respectively, and (b) and (d) plot the function value against communication costs on CIFAR10 and CIFAR100, respectively. (e) and (f) present more results compared with PowerSGD (Vogels et al., 2019) and DRIVE (Vargaftik et al., 2021).

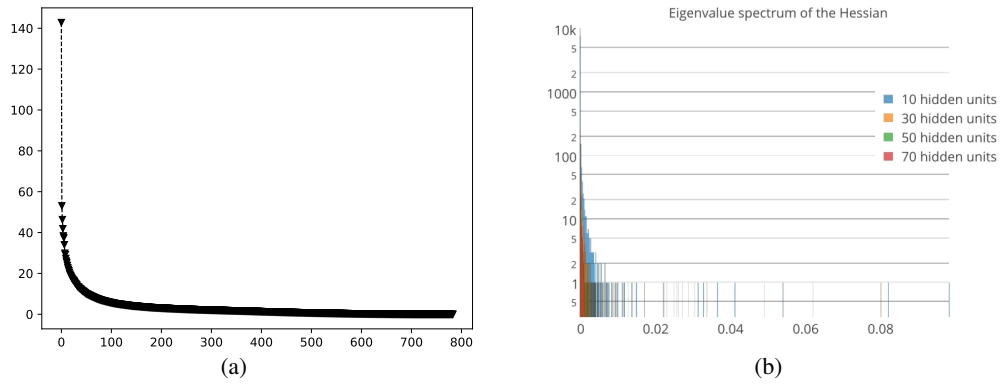

Figure 4: (a) The eigenvalues of the data matrix on MNIST. (b) The eigenvalues of a three-layer neural network on MNIST. (b) is taken directly from Sagun et al. (2016).
